# Influence of rapamycin on safety and healthspan metrics after one year: PEARL trial results

Mauricio Moel<sup>1,2</sup>, Girish Harinath<sup>1,2</sup>, Virginia Lee<sup>1,2</sup>, Andy Nyquist<sup>1</sup>, Stefanie L. Morgan<sup>1,2</sup>, Anar Isman<sup>1</sup>, Sajad Zalzal<sup>1</sup>

<sup>1</sup>AgelessRx, Ann Arbor, MI 48104, USA

<sup>2</sup>Division of Research and Applied Sciences, AgelessRx, Ann Arbor, MI 48104, USA

**Correspondence to:** Stefanie L. Morgan; **email:** [stefanie@agelessrx.com](mailto:stefanie@agelessrx.com), <https://orcid.org/0000-0003-3689-3333>

**Keywords:** rapamycin, aging, healthspan, longevity, geroscience

**Received:** December 2, 2024

**Accepted:** March 25, 2025

**Published:** April 4, 2025

**Copyright:** © 2025 Moel et al. This is an open access article distributed under the terms of the [Creative Commons Attribution License](https://creativecommons.org/licenses/by/4.0/) (CC BY 4.0), which permits unrestricted use, distribution, and reproduction in any medium, provided the original author and source are credited.

## ABSTRACT

**Design:** This 48-week decentralized, double-blinded, randomized, placebo-controlled trial (NCT04488601) evaluated the long-term safety of intermittent low-dose rapamycin in a healthy, normative-aging human cohort. Participants received placebo, 5 mg or 10 mg compounded rapamycin weekly. The primary outcome measure was visceral adiposity (by DXA scan), secondary outcomes were blood biomarkers, and lean tissue and bone mineral content (by DXA scan). Established surveys were utilized to evaluate health and well-being. Safety was assessed through adverse events and blood biomarker monitoring.

**Results:** Adverse and serious adverse events were similar across all groups. Visceral adiposity did not change significantly ( $\eta_p^2 = 0.001$ ,  $p = 0.942$ ), and changes in blood biomarkers remained within normal ranges. Lean tissue mass ( $\eta_p^2 = 0.202$ ,  $p = 0.013$ ) and self-reported pain ( $\eta_p^2 = 0.168$ ,  $p = 0.015$ ) improved significantly for women using 10 mg rapamycin. Self-reported emotional well-being ( $\eta_p^2 = 0.108$ ,  $p = 0.023$ ) and general health ( $\eta_p^2 = 0.166$ ,  $p = 0.004$ ) also improved for those using 5 mg rapamycin. No other significant effects were observed.

**Conclusions:** Low-dose, intermittent rapamycin administration over 48 weeks is relatively safe in healthy, normative-aging adults, and was associated with significant improvements in lean tissue mass and pain in women. Future work will evaluate benefits of a broader range of rapamycin doses on healthspan metrics for longevity, and will aim to more comprehensively establish efficacy.

## INTRODUCTION

Aging is the greatest risk factor for all major chronic diseases, accounting for nearly 70% of human mortality [1–3]. While advancements in medical technologies and public health practices over the past 150 years have led to longer lifespans less shaped by natural selection, the period of disease and disability-free life often referred to as “healthspan” has not kept pace [4]. In conjunction with an epidemic of poor lifestyle habits, this has collectively led to a growing chasm between lifespan and healthspan known as the healthspan gap, which in the United States lasts several decades and is characterized by a high burden of functional disability

and age-related diseases (such as type 2 diabetes, osteoarthritis, and Alzheimer’s) that often coexist as multi-morbidities [5]. While significant research has historically focused on treating these diseases individually, a growing body of work within translational geroscience explores developing gerotherapeutics that slow the aging process and delay the onset of or prevent age-related disease altogether [6].

The field of translational geroscience has made rapid advancements in recent years, due in large part to the strategic utilization of interventions already approved for other conditions by the US Food and Drug Administration (FDA) [7]. By repurposing such drugs

for their potential to target the biology of aging and extend healthy longevity, clinical validation is fast-tracked to permit a more immediate collection of application-specific efficacy data. Notable among these is rapamycin, which is widely used for its purported longevity and healthspan benefits within the pro-longevity community [8]. While evidence supports a role for rapamycin in improving life- and health-spans in preclinical studies [9], little data exists on its clinical efficacy in normative aging humans.

As an FDA-approved small molecule drug, rapamycin is an evolutionary conserved inhibitor of the mammalian target of rapamycin serine/threonine kinase complex 1 (mTORC1), though it is known to also impact mTORC2 in certain contexts. mTORC1 is a known regulator of aging processes, and its hyperactivity has been linked to multiple chronic disease processes [10, 11]. Conversely, partial inhibition of mTORC1 induced by caloric restriction and rapamycin is hypothesized to be a major mediator of their lifespan and healthspan-enhancing effects across organisms from yeast to non-human primates [12–21]. Rapamycin has demonstrated particular efficacy as a geroprotective intervention in mice, extending lifespan in heterogeneous genetic backgrounds in both males and females across multiple studies from independent labs at multiple dosages, dosing periods, and regimens, even in elderly animals [14, 16, 21–25]. Similar effects have been reported to be conserved in companion dogs and marmosets, however, clinical data on rapamycin’s gerotherapeutic effects in humans remains limited [9, 12, 17, 26].

Given the substantial promise of preclinical data, it is essential to obtain a deeper understanding of the clinical benefits of rapamycin use for improving aging in healthy human adults. While biomarkers for evaluating rapamycin’s longevity effects are not yet well defined, body composition metrics provide a more tangible measure of factors known to be associated with age-related disease and mortality risk. Specifically, salient measures such as visceral adipose tissue (VAT) accumulation, a loss of lean muscle tissue, and loss of bone mass are all associated with reductions in quality of life (QoL), increased pain, and limited mobility, particularly for post-menopausal women [27–34]. While available evidence suggests use of low-dose rapamycin may mitigate these features of the aging process to enhance healthspan, many open questions remain [25, 35, 36].

The widespread adoption of rapamycin as a gerotherapeutic has historically been limited by concerns regarding its known impact on immunosuppression, hyperlipidemia, and hyperglycemia [37].

However, the vast majority of these effects stem from chronic daily dosing regimens utilized in severely ill organ transplants or cancer patients, where the clinical aim is inhibition of the immune system or anti-tumorigenic effects. In contrast, as a gerotherapeutic for normative aging populations, low-dose, intermittent rapamycin (commonly administered at 3–10 mg per week of standard commercial formulations or the equivalent) is revealing promise for minimizing side effects while still mitigating aspects of age-related decline [9, 38, 39]. For example, Mannick et al. demonstrated that healthy elderly individuals taking 0.5 mg of a rapalog daily or 5 mg/week for 6 weeks mitigated age-related immune decline by enhancing the adaptive immune system’s response to vaccination [39]. This supports our recent findings from a study of 333 low-dose rapamycin users indicating a high perceived QoL and improved health outcomes compared to non-users [8]. While such promising findings have encouraged some physicians to prescribe off-label rapamycin as a therapy to maintain healthspan, there are many open questions that require further study, particularly in a clinical setting.

An important gap in the clinical understanding of rapamycin for longevity is that to date, no long-term randomized controlled trials (RCT) have been conducted to explore the safety and effectiveness of low-dose, intermittent rapamycin regimens for improving multiple healthspan metrics in normative aging cohorts. The current study, the Participatory Evaluation of Aging with Rapamycin for Longevity (PEARL) trial, aimed to address this gap, and represents the longest clinical study of rapamycin use for healthy aging performed to date.

## RESULTS

A total of 114 participants completed the study and were included in data analysis. An additional 11 discontinued participation prior to study completion, and were not included in these analyses. Of the 114 who completed the study, 40 received 5 mg/week of rapamycin, 35 received 10 mg/week of rapamycin, and 39 received placebo (Supplementary Figure 1). Importantly, in the midst of this trial, we learned that compounded rapamycin, which was used for this work due to placebo generation considerations, could have reduced bioavailability relative to commercial formulations. This trial was temporarily paused while we explored this possibility in an independent cohort. It was subsequently discovered that compounded rapamycin did indeed have approximately  $\frac{1}{3}$  the concentration in blood after 24 hrs relative to commercial [40]. As such, while rapamycin doses are listed at the advertised compounded dose, it should be

noted that equivalent effective doses for compounded forms are approximately 66% less.

Participant dosing groups were not significantly different at baseline on the vast majority of measures, including age, gender, weight, and BMI, however, we observed a relatively low enrollment of women across all groups (35.1% of participants overall ( $n = 40$ ), with 20% in the 10 mg group ( $n = 8$ ), 42.5% in the 5 mg group ( $n = 17$ ), and 38.5% in the placebo group ( $n = 15$ ; Supplementary Tables 1, 2 and Supplementary File 1). For those who discontinued participation, 6 were in the placebo group, 3 in the 10 mg group, and 2 in the 5 mg group. Comprehensive details regarding participants who optionally withdrew are included in Supplementary File 2 and Supplementary Table 3.

Participants who experienced serious adverse events (SAEs) are included in Supplementary File 2 and Supplementary Table 3, and included 1 event in the 10 mg group, 2 in the 5 mg group, and 3 in the placebo. With the exception of one placebo user who was withdrawn, all other participants experiencing SAEs completed the study (Supplementary Figure 2A). For non-severe adverse events (AEs), similar total numbers were reported in all groups (10 mg = 117, 5 mg = 116, placebo = 122), with no clear differences by gender (10 mg: Female = 48, Male = 69, 5 mg: Female = 57, Male = 59, placebo: Female = 76, Male = 46;  $\chi^2$  of all comparisons non-significant). As some participants reported multiple AEs, we compared the number of participants reporting AEs (Supplementary Figure 2B). This was also found to be relatively consistent across all groups and genders (10 mg: Group = 29 (80.6%), Female = 8 (88.9%), Male = 21 (77.8%); 5 mg: Group = 31 (77.5%), Female = 13 (76.5%), Male = 18 (78.3%); placebo: Group = 34 (87.2%), Female = 13 (86.7%), Male = 21 (87.5%); Supplementary Figure 2C), though GI symptoms were reported more often for rapamycin users than placebo (10 mg = 8, 5 mg = 7, placebo = 4).

Phenotypic hallmarks of biological aging were evaluated using DXA scans of body composition after 24 and 48 weeks of treatment, specifically for measures of visceral adipose tissue (VAT), bone mineral content (BMC), bone mineral density (BMD), and lean tissue mass (LTM). Given expected differences in participant body composition and size at baseline (i.e., participants spanned a 43.18 cm range in height, 74.2 kg in weight, and BMI from 18.5–36.5; Supplementary Table 2), all DXA-based body composition measures were normalized to individual baseline as a percent change over the described time before further analysis. Following this normalization, odds ratios were calculated for all body composition measures (Table 1). While the small sample sizes in this study produced

predictably large 95% confidence intervals, significant  $p$ -values were nonetheless observed for measures of decreased bone mineral density (OR = 0.24, 95% CI = 0.06–0.93,  $p = 0.04$ ) and for increased lean tissue mass in females (OR = 28, 95% CI = 2.42–323.7,  $p = 0.008$ ).

Subsequent simplified analysis (following multiple statistical approaches detailed in Supplementary Table 4) of DXA-based body composition changes at 24 and 48 weeks by dosing group suggested significant differences only in the secondary endpoint of LTM for females across dosing groups after both 24 and 48 weeks (24w:  $F(2, 36) = 4.208$ ,  $p = 0.023$ ,  $\varepsilon^2 = 0.144$ ; 48w:  $F(2, 30) = 5.052$ ,  $p = 0.013$ ,  $\varepsilon^2 = 0.202$ ), with Bonferroni-corrected post-hoc analyses suggesting the 10 mg group had significant increases in at both timepoints relative to both placebo and 5 mg groups (placebo –24w:  $md = 3.60472$  (95% CI = 0.0913–7.1182),  $p = 0.043$ ; 48w:  $md = 6.194$  (95% CI = 0.8773–11.5105),  $p = 0.018$ ; 5 mg–24 w:  $md = 3.774$  (95% CI = 0.3271–7.2212),  $p = 0.028$ ; 48w:  $md = 5.565$  (95% CI = 0.5311–10.5979),  $p = 0.026$ ; Table 2, Figure 1A, Supplementary Figures 3A–H and 4A). Interestingly, no significant differences were found for the primary end point of VAT after 48 weeks for either gender (Table 2, Supplementary Table 4, Figure 1B and Supplementary Figure 4B), or for the secondary end point of BMC after 48 weeks (Table 2, Figure 1C, 1D and Supplementary Figure 4C, 4D). While surprising, limited sample sizes and variability in individual response (Supplementary Figure 3E–3H) likely restricted the statistical interpretation of results for this trial cohort.

As established blood biomarkers for evaluating rapamycin's longevity impacts have not yet been well established, we examined comprehensive blood work panels for overall health and longevity signals at 0 weeks, 24 weeks, and 48 weeks of the study. These same tests were utilized for safety monitoring in this trial cohort. Multiple analyses suggested no significant changes for most values over time, and any observed changes remained within normal result windows (a complete table of results is available in Supplementary Tables 5 and 6). However, given concerns regarding rapamycin use and impacts on blood cells, insulin, and kidney health, it is worth noting that some changes were observed over the course of the study for RBCs, BUN, Hemoglobin A1C, carbon dioxide, and calcium levels. Specifically, RBCs increased for the 5 mg group but not others ( $F(4, 198) = 2.677$ ,  $p = 0.033$ ,  $\eta_p^2 = 0.051$ ,  $md = 0.109$  (95% CI = –0.189–0.003),  $p = 0.042$ ), and BUN levels increased only for males in the 10 mg treatment group ( $F(4, 102) = 2.805$ ,  $p = 0.030$ ,  $\eta_p^2 = 0.099$ ;  $md = 2.222$  (95% CI = 0.161–4.238),  $p = 0.031$ ). Similarly, males in the 5 mg cohort demonstrated small

**Table 1. Odds ratios of improvement on body composition metrics.**

| VAT        | Odds Ratios |           |                  |        |            |                 |      |           |                 |
|------------|-------------|-----------|------------------|--------|------------|-----------------|------|-----------|-----------------|
|            | All         |           |                  | Female |            |                 | Male |           |                 |
|            | OR          | 95% CI    | <i>p</i> -value* | OR     | 95% CI     | <i>p</i> -value | OR   | 95% CI    | <i>p</i> -value |
| 10 mg      | 1.68        | 0.66–4.32 | 0.28             | 4      | 0.61–26.12 | 0.15            | 1.12 | 0.37–3.40 | 0.84            |
| 5 mg       | 1.81        | 0.73–4.50 | 0.20             | 2.8    | 0.57–13.75 | 0.21            | 1.53 | 0.48–4.86 | 0.47            |
| <b>BMD</b> |             |           |                  |        |            |                 |      |           |                 |
| 10 mg      | 1.00        | 0.35–2.85 | 0.99             | 0.67   | 0.10–4.58  | 0.68            | 1.33 | 0.36–4.92 | 0.67            |
| 5 mg       | 0.24        | 0.06–0.93 | <b>0.04*</b>     | 0.13   | 0.13–1.23  | 0.07            | 0.36 | 0.06–2.09 | 0.26            |
| <b>BMC</b> |             |           |                  |        |            |                 |      |           |                 |
| 10 mg      | 1.33        | 0.49–3.56 | 0.57             | 0.39   | 0.04–4.28  | 0.44            | 1.67 | 0.52–5.39 | 0.39            |
| 5 mg       | 0.74        | 0.27–2.05 | 0.56             | 0.85   | 0.17–4.19  | 0.84            | 0.68 | 0.18–2.54 | 0.56            |
| <b>LTM</b> |             |           |                  |        |            |                 |      |           |                 |
| 10 mg      | 2.29        | 0.81–4.49 | 0.12             | 28     | 2.42–323.7 | <b>0.008*</b>   | 1.09 | 0.28–4.14 | 0.90            |
| 5 mg       | 1.66        | 0.59–4.63 | 0.34             | 1.67   | 0.32–2.42  | 0.54            | 1.66 | 0.44–6.26 | 0.45            |

\**p* ≤ 0.05.

**Table 2. Changes in body composition by DXA scan after 24 and 48 weeks.**

| ANOVA of body composition changes by gender |       |       |                 |               |         |         |                 |           |                 |                     |             |         |
|---------------------------------------------|-------|-------|-----------------|---------------|---------|---------|-----------------|-----------|-----------------|---------------------|-------------|---------|
| Females after 24 weeks                      |       |       |                 |               |         |         |                 |           |                 | 95%                 |             |         |
|                                             | df    | F     | <i>p</i> -value | Effect size** | Group 1 | Group 2 | Mean difference | Std error | <i>p</i> -value | Confidence interval |             |         |
|                                             |       |       |                 |               |         |         |                 |           |                 | Lower bound         | Upper bound |         |
| VAT                                         | 2, 36 | 1.135 | 0.333           | 0.007         | Placebo | 10 mg   | Placebo         | −19.95911 | 18.55764        | 0.868               | −66.5581    | 26.6399 |
|                                             |       |       |                 |               |         | 5 mg    | Placebo         | −27.57582 | 18.35482        | 0.425               | −73.6655    | 18.5139 |
|                                             |       |       |                 |               |         | Placebo | 10 mg           | 19.95911  | 18.55764        | 0.868               | −26.6399    | 66.5581 |
|                                             |       |       |                 |               |         | 5 mg    | 10 mg           | −7.6167   | 15.23438        | 1                   | −45.8708    | 30.6374 |
|                                             |       |       |                 |               |         | 5 mg    | 10 mg           | 27.57582  | 18.35482        | 0.425               | −18.5139    | 73.6655 |
|                                             |       |       |                 |               |         | Placebo | Placebo         | 7.6167    | 15.23438        | 1                   | −30.6374    | 45.8708 |
| BMD                                         | 2, 35 | 0.029 | 0.972           | −0.055        | Placebo | 10 mg   | Placebo         | −0.08426  | 0.75078         | 1                   | −1.9721     | 1.8036  |
|                                             |       |       |                 |               |         | 5 mg    | Placebo         | −0.17587  | 0.75078         | 1                   | −2.0637     | 1.712   |
|                                             |       |       |                 |               |         | Placebo | 10 mg           | 0.08426   | 0.75078         | 1                   | −1.8036     | 1.9721  |
|                                             |       |       |                 |               |         | 5 mg    | 10 mg           | −0.09161  | 0.6262          | 1                   | −1.6662     | 1.483   |
|                                             |       |       |                 |               |         | 5 mg    | 10 mg           | 0.17587   | 0.75078         | 1                   | −1.712      | 2.0637  |
|                                             |       |       |                 |               |         | Placebo | Placebo         | 0.09161   | 0.6262          | 1                   | −1.483      | 1.6662  |
| BMC                                         | 2, 35 | 0.699 | 0.504           | −0.017        | Placebo | 10 mg   | Placebo         | −0.92574  | 1.60565         | 1                   | −4.9632     | 3.1117  |
|                                             |       |       |                 |               |         | 5 mg    | Placebo         | −1.86067  | 1.60565         | 0.763               | −5.8981     | 2.1768  |
|                                             |       |       |                 |               |         | Placebo | 10 mg           | 0.92574   | 1.60565         | 1                   | −3.1117     | 4.9632  |
|                                             |       |       |                 |               |         | 5 mg    | 10 mg           | −0.93493  | 1.3392          | 1                   | −4.3024     | 2.4325  |
|                                             |       |       |                 |               |         | 5 mg    | 10 mg           | 1.86067   | 1.60565         | 0.763               | −2.1768     | 5.8981  |
|                                             |       |       |                 |               |         | Placebo | Placebo         | 0.93493   | 1.3392          | 1                   | −2.4325     | 4.3024  |
| LTM                                         | 2, 36 | 4.208 | 0.023           | 0.144         | Placebo | 10 mg   | Placebo         | 3.60472*  | 1.39919         | 0.043               | 0.0913      | 7.1182  |
|                                             |       |       |                 |               |         | 5 mg    | Placebo         | 3.77419*  | 1.37276         | 0.028               | 0.3271      | 7.2212  |
|                                             |       |       |                 |               |         | Placebo | 10 mg           | −3.60472* | 1.39919         | 0.043               | −7.1182     | −0.0913 |
|                                             |       |       |                 |               |         | 5 mg    | 10 mg           | 0.16947   | 1.08284         | 1                   | −2.5496     | 2.8885  |
|                                             |       |       |                 |               |         | 5 mg    | 10 mg           | −3.77419* | 1.37276         | 0.028               | −7.2212     | −0.3271 |
|                                             |       |       |                 |               |         | Placebo | Placebo         | −0.16947  | 1.08284         | 1                   | −2.8885     | 2.5496  |

**Females after 48 weeks**

|     |       |       |       |        |         |         |           |          |       |          |         |
|-----|-------|-------|-------|--------|---------|---------|-----------|----------|-------|----------|---------|
|     |       |       |       |        | 10 mg   | Placebo | -11.39146 | 24.13444 | 1     | -72.7149 | 49.9319 |
|     |       |       |       |        |         | 5 mg    | -8.8483   | 22.97064 | 1     | -67.2146 | 49.518  |
| VAT | 2, 29 | 0.115 | 0.892 | -0.061 | Placebo | 10 mg   | 11.39146  | 24.13444 | 1     | -49.9319 | 72.7149 |
|     |       |       |       |        |         | 5 mg    | 2.54316   | 18.87685 | 1     | -45.4212 | 50.5075 |
|     |       |       |       |        | 5 mg    | 10 mg   | 8.8483    | 22.97064 | 1     | -49.518  | 67.2146 |
|     |       |       |       |        |         | Placebo | -2.54316  | 18.87685 | 1     | -50.5075 | 45.4212 |
|     |       |       |       |        | 10 mg   | Placebo | 12.83206  | 12.06834 | 0.885 | -17.5143 | 43.1784 |
|     |       |       |       |        |         | 5 mg    | 7.06968   | 12.06834 | 1     | -23.2767 | 37.416  |
| BMD | 2, 35 | 0.575 | 0.568 | -0.23  | Placebo | 10 mg   | -12.83206 | 12.06834 | 0.885 | -43.1784 | 17.5143 |
|     |       |       |       |        |         | 5 mg    | -5.76237  | 10.06569 | 1     | -31.073  | 19.5482 |
|     |       |       |       |        | 5 mg    | 10 mg   | -7.06968  | 12.06834 | 1     | -37.416  | 23.2767 |
|     |       |       |       |        |         | Placebo | 5.76237   | 10.06569 | 1     | -19.5482 | 31.073  |
|     |       |       |       |        | 10 mg   | Placebo | -0.76923  | 1.71819  | 1     | -5.1445  | 3.6061  |
|     |       |       |       |        |         | 5 mg    | -0.90536  | 1.666    | 1     | -5.1478  | 3.3371  |
| BMC | 2, 28 | 0.157 | 0.856 | -0.06  | Placebo | 10 mg   | 0.76923   | 1.71819  | 1     | -3.6061  | 5.1445  |
|     |       |       |       |        |         | 5 mg    | -0.13613  | 1.45586  | 1     | -3.8434  | 3.5712  |
|     |       |       |       |        | 5 mg    | 10 mg   | 0.90536   | 1.666    | 1     | -3.3371  | 5.1478  |
|     |       |       |       |        |         | Placebo | 0.13613   | 1.45586  | 1     | -3.5712  | 3.8434  |
|     |       |       |       |        | 10 mg   | Placebo | 6.19390*  | 2.09667  | 0.018 | 0.8773   | 11.5105 |
|     |       |       |       |        |         | 5 mg    | 5.56454*  | 1.98498  | 0.026 | 0.5311   | 10.5979 |
| LTM | 2, 30 | 5.052 | 0.013 | 0.202  | Placebo | 10 mg   | -6.19390* | 2.09667  | 0.018 | -11.5105 | -0.8773 |
|     |       |       |       |        |         | 5 mg    | -0.62936  | 1.72141  | 1     | -4.9944  | 3.7357  |
|     |       |       |       |        | 5 mg    | 10 mg   | -5.56454* | 1.98498  | 0.026 | -10.5979 | -0.5311 |
|     |       |       |       |        |         | Placebo | 0.62936   | 1.72141  | 1     | -3.7357  | 4.9944  |

**Males after 24 weeks**

|     |       |       |       |        |         |         |            |          |       |          |         |
|-----|-------|-------|-------|--------|---------|---------|------------|----------|-------|----------|---------|
|     |       |       |       |        | 10 mg   | Placebo | 7.65337    | 7.46072  | 0.927 | -10.6969 | 26.0036 |
|     |       |       |       |        |         | 5 mg    | 19.52029*  | 7.37156  | 0.031 | 1.3893   | 37.6513 |
| VAT | 2, 63 | 3.548 | 0.035 | 0.073  | Placebo | 10 mg   | -7.65337   | 7.46072  | 0.927 | -26.0036 | 10.6969 |
|     |       |       |       |        |         | 5 mg    | 11.86692   | 7.54122  | 0.362 | -6.6813  | 30.4152 |
|     |       |       |       |        | 5 mg    | 10 mg   | -19.52029* | 7.37156  | 0.031 | -37.6513 | -1.3893 |
|     |       |       |       |        |         | Placebo | -11.86692  | 7.54122  | 0.362 | -30.4152 | 6.6813  |
|     |       |       |       |        | 10 mg   | Placebo | -1.57949   | 9.98452  | 1     | -26.079  | 22.92   |
|     |       |       |       |        |         | 5 mg    | -8.8775    | 10.3552  | 1     | -34.2865 | 16.5315 |
| BMD | 2, 69 | 0.401 | 0.671 | -0.017 | Placebo | 10 mg   | 1.57949    | 9.98452  | 1     | -22.92   | 26.079  |
|     |       |       |       |        |         | 5 mg    | -7.29801   | 10.63458 | 1     | -33.3926 | 18.7965 |
|     |       |       |       |        | 5 mg    | 10 mg   | 8.8775     | 10.3552  | 1     | -16.5315 | 34.2865 |
|     |       |       |       |        |         | Placebo | 7.29801    | 10.63458 | 1     | -18.7965 | 33.3926 |
|     |       |       |       |        | 10 mg   | Placebo | 1.04581    | 0.90798  | 0.762 | -1.1905  | 3.2821  |
|     |       |       |       |        |         | 5 mg    | 1.43883    | 0.93263  | 0.384 | -0.8582  | 3.7358  |
| BMC | 2, 60 | 1.311 | 0.277 | 0.01   | Placebo | 10 mg   | -1.04581   | 0.90798  | 0.762 | -3.2821  | 1.1905  |
|     |       |       |       |        |         | 5 mg    | 0.39302    | 0.95251  | 1     | -1.953   | 2.739   |
|     |       |       |       |        | 5 mg    | 10 mg   | -1.43883   | 0.93263  | 0.384 | -3.7358  | 0.8582  |
|     |       |       |       |        |         | Placebo | -0.39302   | 0.95251  | 1     | -2.739   | 1.953   |
|     |       |       |       |        | 10 mg   | Placebo | 0.00392    | 0.88827  | 1     | -2.1818  | 2.1897  |
|     |       |       |       |        |         | 5 mg    | -0.44255   | 0.88827  | 1     | -2.6283  | 1.7432  |
| LTM | 2, 62 | 0.162 | 0.851 | -0.027 | Placebo | 10 mg   | -0.00392   | 0.88827  | 1     | -2.1897  | 2.1818  |
|     |       |       |       |        |         | 5 mg    | -0.44648   | 0.90823  | 1     | -2.6813  | 1.7884  |
|     |       |       |       |        | 5 mg    | 10 mg   | 0.44255    | 0.88827  | 1     | -1.7432  | 2.6283  |
|     |       |       |       |        |         | Placebo | 0.44648    | 0.90823  | 1     | -1.7884  | 2.6813  |



**Males after 48 weeks**

| VAT | 2, 54 | 0.625 | 0.539 | 0.088 | Placebo | 10 mg | Placebo | -4.61129  | 12.4849  | 1     | -35.4596 | 26.237  |  |  |  |  |  |  |
|-----|-------|-------|-------|-------|---------|-------|---------|-----------|----------|-------|----------|---------|--|--|--|--|--|--|
|     |       |       |       |       |         | 5 mg  | Placebo | 9.35657   | 12.81836 | 1     | -22.3157 | 41.0288 |  |  |  |  |  |  |
|     |       |       |       |       |         | 10 mg | 10 mg   | 4.61129   | 12.4849  | 1     | -26.237  | 35.4596 |  |  |  |  |  |  |
|     |       |       |       |       |         | 5 mg  | 5 mg    | 13.96786  | 12.6615  | 0.825 | -17.3168 | 45.2525 |  |  |  |  |  |  |
|     |       |       |       |       |         | 10 mg | 10 mg   | -9.35657  | 12.81836 | 1     | -41.0288 | 22.3157 |  |  |  |  |  |  |
|     |       |       |       |       |         | 5 mg  | Placebo | -13.96786 | 12.6615  | 0.825 | -45.2525 | 17.3168 |  |  |  |  |  |  |
| BMD | 2, 69 | 0.219 | 0.804 | 0.033 | Placebo | 10 mg | Placebo | 2.24729   | 11.0736  | 1     | -24.9245 | 29.4191 |  |  |  |  |  |  |
|     |       |       |       |       |         | 5 mg  | Placebo | -5.39434  | 11.48471 | 1     | -33.5749 | 22.7862 |  |  |  |  |  |  |
|     |       |       |       |       |         | 10 mg | 10 mg   | -2.24729  | 11.0736  | 1     | -29.4191 | 24.9245 |  |  |  |  |  |  |
|     |       |       |       |       |         | 5 mg  | 5 mg    | -7.64163  | 11.79457 | 1     | -36.5825 | 21.2992 |  |  |  |  |  |  |
|     |       |       |       |       |         | 10 mg | 10 mg   | 5.39434   | 11.48471 | 1     | -22.7862 | 33.5749 |  |  |  |  |  |  |
|     |       |       |       |       |         | 5 mg  | Placebo | 7.64163   | 11.79457 | 1     | -21.2992 | 36.5825 |  |  |  |  |  |  |
| BMC | 2, 52 | 2.949 | 0.061 | 0.221 | Placebo | 10 mg | Placebo | 1.38327   | 1.00751  | 0.527 | -1.1092  | 3.8757  |  |  |  |  |  |  |
|     |       |       |       |       |         | 5 mg  | Placebo | 2.57988   | 1.0671   | 0.057 | -0.06    | 5.2198  |  |  |  |  |  |  |
|     |       |       |       |       |         | 10 mg | 10 mg   | -1.38327  | 1.00751  | 0.527 | -3.8757  | 1.1092  |  |  |  |  |  |  |
|     |       |       |       |       |         | 5 mg  | 5 mg    | 1.19661   | 1.05483  | 0.785 | -1.4129  | 3.8062  |  |  |  |  |  |  |
|     |       |       |       |       |         | 10 mg | 10 mg   | -2.57988  | 1.0671   | 0.057 | -5.2198  | 0.06    |  |  |  |  |  |  |
|     |       |       |       |       |         | 5 mg  | Placebo | -1.19661  | 1.05483  | 0.785 | -3.8062  | 1.4129  |  |  |  |  |  |  |
| LTM | 2, 54 | 0.379 | 0.686 | 0.063 | Placebo | 10 mg | Placebo | 1.15136   | 1.40058  | 1     | -2.3093  | 4.612   |  |  |  |  |  |  |
|     |       |       |       |       |         | 5 mg  | Placebo | 0.23314   | 1.43799  | 1     | -3.3199  | 3.7862  |  |  |  |  |  |  |
|     |       |       |       |       |         | 10 mg | 10 mg   | -1.15136  | 1.40058  | 1     | -4.612   | 2.3093  |  |  |  |  |  |  |
|     |       |       |       |       |         | 5 mg  | 5 mg    | -0.91822  | 1.4204   | 1     | -4.4278  | 2.5914  |  |  |  |  |  |  |
|     |       |       |       |       |         | 10 mg | 10 mg   | -0.23314  | 1.43799  | 1     | -3.7862  | 3.3199  |  |  |  |  |  |  |
|     |       |       |       |       |         | 5 mg  | Placebo | 0.91822   | 1.4204   | 1     | -2.5914  | 4.4278  |  |  |  |  |  |  |

Abbreviation: df: degrees of freedom. Provided as: between groups, within groups. \* $p \leq 0.05$ . \*\*effect size provided as epsilon squared for ANOVA or omega squared for Welch's ANOVA. post hoc tests were performed using the Bonferroni correction.

Hemoglobin A1C increases at 48 weeks ( $F(2, 114) = 4.821, p = 0.010, \eta_p^2 = 0.078; md = 0.059$  (95% CI = 0.006–0.112),  $p = 0.024$ ), though no significant changes were observed in glucose or insulin levels (Supplementary Tables 5 and 6). In contrast, carbon dioxide levels decreased overall in the 10 mg cohort over the course of the study ( $F(2, 52) = 7.492, p = 0.001, \eta_p^2 = 0.224, md = -1.308$  (95% CI = -2.301–-0.315),  $p = 0.006$ ), while calcium significantly decreased only for males in the 10 mg cohort ( $F(2, 40) = 3.827, p = 0.030, \eta_p^2 = 0.161; md = -0.167$  (95% CI = -0.317–-0.017),  $p = 0.027$ ).

In the interest of comprehensively evaluating rapamycin responses in our participants, we submitted a subset of samples for epigenetic aging analysis (TruAge from TruDiagnostic,  $n = 24$ , 9 female and 15 male) and gut microbiome analysis (Gut Health Test from Thorne,  $n = 81$ , 31 female and 50 male). Within the epigenetic testing results, we saw no meaningful significant changes between groups. In the gut microbiome testing, simplified analysis suggested small but significant

increases after 48 weeks in gut dysbiosis in males in the 10 mg treatment group ( $F(1, 18) = 4.729, p = 0.045, \eta_p^2 = 0.228; md = 2.235$  (95% CI = 0.056–4.414),  $p = 0.045$ ), and trends of increased intestinal permeability in females in the 10 mg group ( $F(1,4) = 6.641, p = 0.062, \eta_p^2 = 0.624; md = 3.020$  (95% CI = -0.234–6.274),  $p = 0.062$ , Supplementary Table 7).

In addition to biological measures of health, the impacts of low-dose rapamycin on quality of life (QoL) measures were evaluated using validated surveys of self-reported well-being and health (the SF-36 and WOMAC scales, specifically). These were administered to study participants electronically at 0 weeks, 24 weeks, and 48 weeks. Changes in WOMAC scores over time were non-significant for all analyses across all treatment groups (Supplementary Table 8). However, multi-faceted analysis of SF-36 scores (detailed in Tables 3, 4 and Supplementary Table 9) suggested robustly significant improvements in measures of pain for females over time at both 24 and 48 weeks

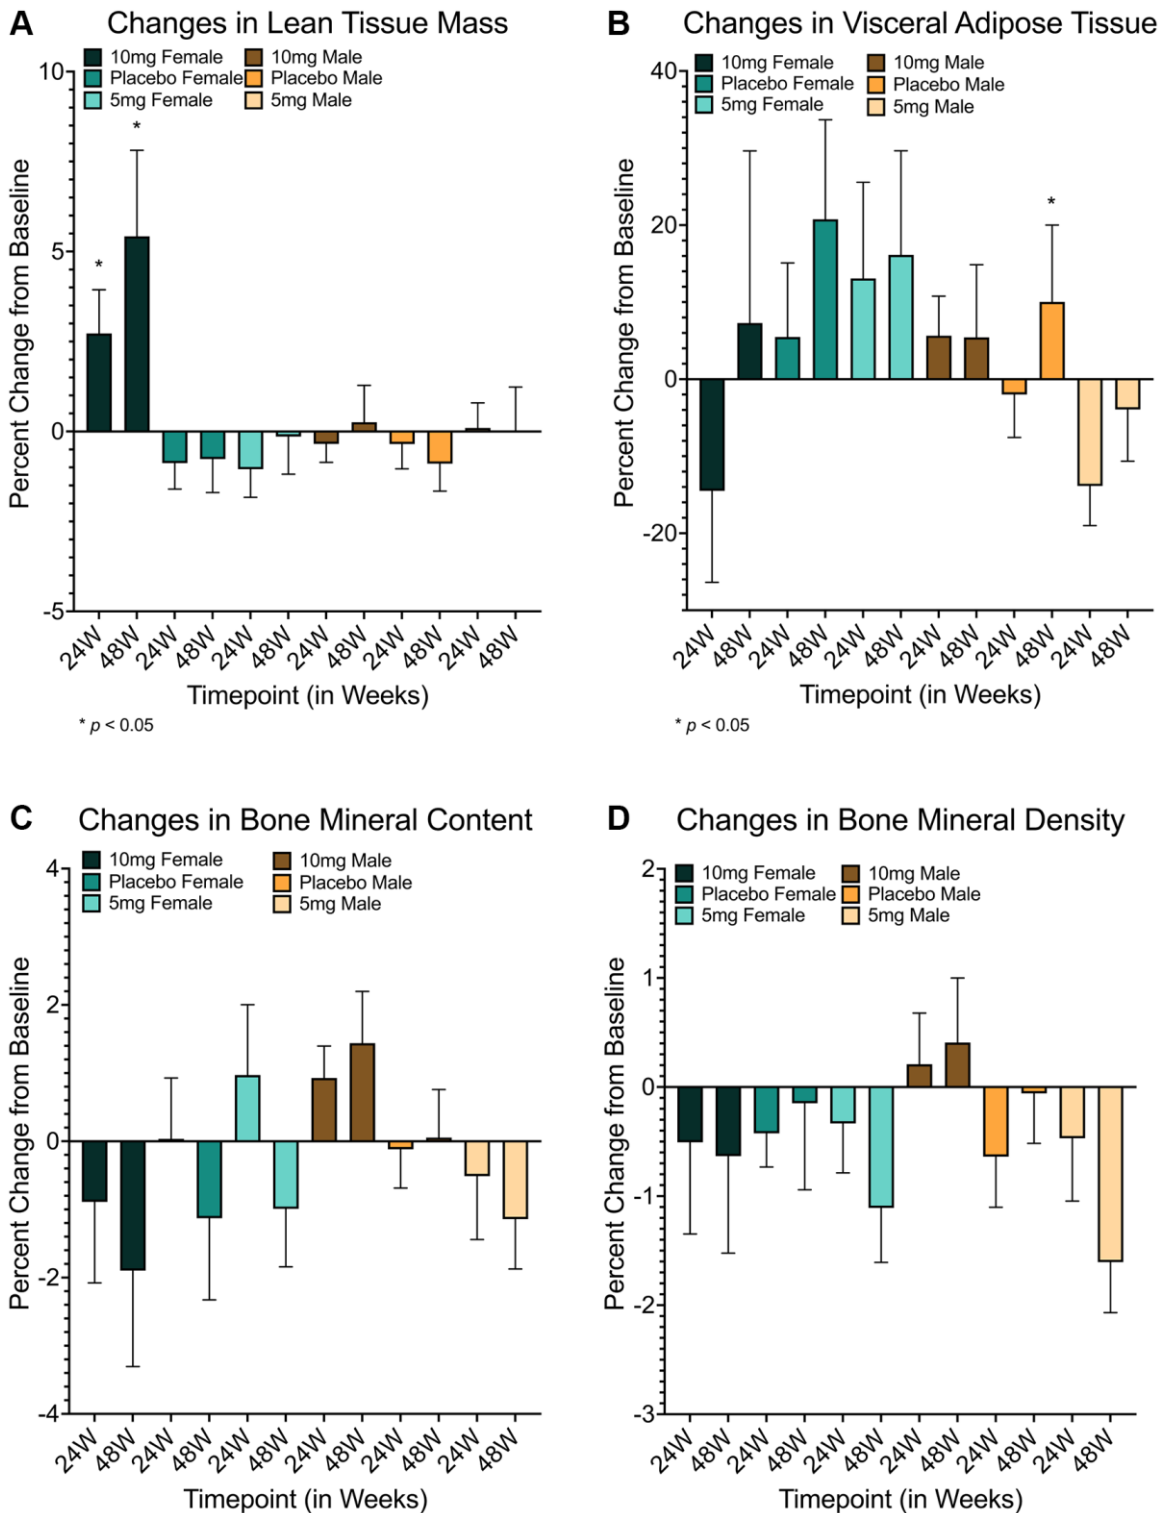

**Figure 1. Changes in body composition measures in response to rapamycin use.** Females using 10 mg of rapamycin had significant improvements in lean tissue mass at 24 and 48 weeks relative to both placebo (24 week:  $md = 3.60472$  (95% CI = 0.0913–7.1182),  $p = 0.043$ ; 48 week:  $md = 6.194$  (95% CI = 0.8773–11.5105),  $p = 0.018$ ) and 5mg groups (24 week:  $md = 3.774$  (95% CI = 0.3271–7.2212),  $p = 0.028$ ; 48 week:  $md = 5.565$  (95% CI = 0.5311–10.5979),  $p = 0.026$ ) (A). Improvements in visceral adiposity (measured by VAT) were clear for males in the 5 mg cohort relative to the 10 mg cohort ( $md = -19.520$  (95% CI = -37.6513–-1.3893),  $p = 0.031$ ) but not placebo ( $md = -11.866$  (95% CI = -30.4152–6.6813),  $p = 0.362$ ) at 24 weeks, but reverted to non-significance after 48 weeks (B). While no other measures showed significant differences (C, D), trending differences were observed in BMC for males at 48 weeks in 10 mg versus 5 mg groups ( $md = 2.580$  (95% CI = -0.0600–5.2198),  $p = 0.057$ ) but not placebo ( $md = 1.383$  (95% CI = -1.1092–3.8757),  $p = 0.527$ ) (C).  $md$  = mean difference,  $*p \leq 0.05$ . Error bars represent standard error of the mean.

**Table 3. Changes in SF-36 self-reported measures of well-being over 48 weeks.**

| Repeated mixed measure ANOVA of SF36 measures        |       |        |       |         |                     |          |          |                 |            |         |                         |             |
|------------------------------------------------------|-------|--------|-------|---------|---------------------|----------|----------|-----------------|------------|---------|-------------------------|-------------|
| Change in scores for females                         |       |        |       |         |                     |          |          |                 |            |         | 95% Confidence interval |             |
|                                                      | df 1  | df 2   | F     | p-value | Partial Eta squared | Time 1   | Time 2   | Mean difference | Std. Error | p-value | Lower bound             | Upper bound |
| Physical Function                                    | 4     | 66     | 0.423 | 0.792   | 0.025               | Baseline | 24 weeks | 0.291           | 0.83       | 1       | -1.804                  | 2.385       |
|                                                      |       |        |       |         |                     |          | 48 weeks | -0.462          | 0.842      | 1       | -2.584                  | 1.661       |
|                                                      |       |        |       |         |                     | 24 weeks | Baseline | -0.291          | 0.83       | 1       | -2.385                  | 1.804       |
|                                                      |       |        |       |         |                     |          | 48 weeks | -0.752          | 0.951      | 1       | -3.151                  | 1.647       |
| Role limitations due to physical health <sup>^</sup> | 3.324 | 54.841 | 0.831 | 0.493   | 0.048               | 48 weeks | Baseline | 0.462           | 0.842      | 1       | -1.661                  | 2.584       |
|                                                      |       |        |       |         |                     |          | 24 weeks | 0.752           | 0.951      | 1       | -1.647                  | 3.151       |
|                                                      |       |        |       |         |                     | Baseline | 24 weeks | -6.571          | 3.423      | 0.191   | -15.204                 | 2.063       |
|                                                      |       |        |       |         |                     |          | 48 weeks | -4.076          | 4.313      | 1       | -14.955                 | 6.803       |
| Role limitations due to emotional problems           | 4     | 66     | 0.691 | 0.601   | 0.04                | 24 weeks | Baseline | 6.571           | 3.423      | 0.191   | -2.063                  | 15.204      |
|                                                      |       |        |       |         |                     |          | 48 weeks | 2.495           | 2.948      | 1       | -4.941                  | 9.931       |
|                                                      |       |        |       |         |                     | 48 weeks | Baseline | 4.076           | 4.313      | 1       | -6.803                  | 14.955      |
|                                                      |       |        |       |         |                     |          | 24 weeks | -2.495          | 2.948      | 1       | -9.931                  | 4.941       |
| Energy/Fatigue                                       | 4     | 66     | 0.632 | 0.642   | 0.037               | Baseline | 24 weeks | -1.484          | 2.788      | 1       | -8.516                  | 5.547       |
|                                                      |       |        |       |         |                     |          | 48 weeks | -0.949          | 2.358      | 1       | -6.895                  | 4.998       |
|                                                      |       |        |       |         |                     | 24 weeks | Baseline | 1.484           | 2.788      | 1       | -5.547                  | 8.516       |
|                                                      |       |        |       |         |                     |          | 48 weeks | 0.536           | 1.953      | 1       | -4.39                   | 5.462       |
| Emotional Wellbeing                                  | 4     | 66     | 0.575 | 0.682   | 0.034               | 48 weeks | Baseline | 0.949           | 2.358      | 1       | -4.998                  | 6.895       |
|                                                      |       |        |       |         |                     |          | 24 weeks | -0.536          | 1.953      | 1       | -5.462                  | 4.39        |
|                                                      |       |        |       |         |                     | Baseline | 24 weeks | -5.960*         | 2.285      | 0.041   | -11.723                 | -0.198      |
|                                                      |       |        |       |         |                     |          | 48 weeks | -7.518*         | 2.668      | 0.024   | -14.248                 | -0.788      |
| Social Functioning <sup>^</sup>                      | 2.871 | 47.365 | 0.901 | 0.444   | 0.052               | 24 weeks | Baseline | 5.960*          | 2.285      | 0.041   | 0.198                   | 11.723      |
|                                                      |       |        |       |         |                     |          | 48 weeks | -1.558          | 1.908      | 1       | -6.369                  | 3.254       |
|                                                      |       |        |       |         |                     | 48 weeks | Baseline | 7.518*          | 2.668      | 0.024   | 0.788                   | 14.248      |
|                                                      |       |        |       |         |                     |          | 24 weeks | 1.558           | 1.908      | 1       | -3.254                  | 6.369       |
| Pain                                                 | 4     | 66     | 3.331 | 0.015   | 0.168               | Baseline | 24 weeks | -4.17           | 1.697      | 0.058   | -8.451                  | 0.111       |
|                                                      |       |        |       |         |                     |          | 48 weeks | -4.921          | 1.969      | 0.053   | -9.888                  | 0.045       |
|                                                      |       |        |       |         |                     | 24 weeks | Baseline | 4.17            | 1.697      | 0.058   | -0.111                  | 8.451       |
|                                                      |       |        |       |         |                     |          | 48 weeks | -0.751          | 1.467      | 1       | -4.451                  | 2.948       |
| General Health                                       | 4     | 66     | 0.21  | 0.932   | 0.013               | 48 weeks | Baseline | 4.921           | 1.969      | 0.053   | -0.045                  | 9.888       |
|                                                      |       |        |       |         |                     |          | 24 weeks | 0.751           | 1.467      | 1       | -2.948                  | 4.451       |
|                                                      |       |        |       |         |                     | Baseline | 24 weeks | -6.151          | 2.513      | 0.06    | -12.489                 | 0.187       |
|                                                      |       |        |       |         |                     |          | 48 weeks | -6.197          | 2.685      | 0.082   | -12.969                 | 0.576       |
| Pain                                                 | 4     | 66     | 3.331 | 0.015   | 0.168               | 24 weeks | Baseline | 6.151           | 2.513      | 0.06    | -0.187                  | 12.489      |
|                                                      |       |        |       |         |                     |          | 48 weeks | -0.045          | 1.402      | 1       | -3.582                  | 3.491       |
|                                                      |       |        |       |         |                     | 48 weeks | Baseline | 6.197           | 2.685      | 0.082   | -0.576                  | 12.969      |
|                                                      |       |        |       |         |                     |          | 24 weeks | 0.045           | 1.402      | 1       | -3.491                  | 3.582       |
| General Health                                       | 4     | 66     | 0.21  | 0.932   | 0.013               | Baseline | 24 weeks | -6.765*         | 2.161      | 0.011   | -12.215                 | -1.315      |
|                                                      |       |        |       |         |                     |          | 48 weeks | -8.071*         | 1.993      | <.001   | -13.098                 | -3.044      |
|                                                      |       |        |       |         |                     | 24 weeks | Baseline | 6.765*          | 2.161      | 0.011   | 1.315                   | 12.215      |
|                                                      |       |        |       |         |                     |          | 48 weeks | -1.306          | 1.794      | 1       | -5.832                  | 3.22        |
| General Health                                       | 4     | 66     | 0.21  | 0.932   | 0.013               | 48 weeks | Baseline | 8.071*          | 1.993      | <.001   | 3.044                   | 13.098      |
|                                                      |       |        |       |         |                     |          | 24 weeks | 1.306           | 1.794      | 1       | -3.22                   | 5.832       |
|                                                      |       |        |       |         |                     | Baseline | 24 weeks | -6.000*         | 2.07       | 0.02    | -11.222                 | -0.778      |
|                                                      |       |        |       |         |                     |          | 48 weeks | -5.063          | 2.048      | 0.056   | -10.228                 | 0.102       |
| General Health                                       | 4     | 66     | 0.21  | 0.932   | 0.013               | 24 weeks | Baseline | 6.000*          | 2.07       | 0.02    | 0.778                   | 11.222      |
|                                                      |       |        |       |         |                     |          | 48 weeks | 0.937           | 1.536      | 1       | -2.936                  | 4.81        |
|                                                      |       |        |       |         |                     | 48 weeks | Baseline | 5.063           | 2.048      | 0.056   | -0.102                  | 10.228      |
|                                                      |       |        |       |         |                     |          | 24 weeks | -0.937          | 1.536      | 1       | -4.81                   | 2.936       |



**Change in scores for males**

| Outcome                                                 | F     | df     | $\eta_p^2$ | p     | p     | Time     |          | Group    |          | Interaction |          |          |
|---------------------------------------------------------|-------|--------|------------|-------|-------|----------|----------|----------|----------|-------------|----------|----------|
|                                                         |       |        |            |       |       | Baseline | 24 weeks | Baseline | 24 weeks | Baseline    | 24 weeks | Baseline |
| Physical Function <sup>^</sup>                          | 3.099 | 86.762 | 0.28       | 0.846 | 0.01  | Baseline | 24 weeks | 0.616    | 0.83     | 1           | -1.432   | 2.663    |
|                                                         |       |        |            |       |       | 48 weeks | 0.874    | 0.983    | 1        | -1.552      | 3.299    |          |
|                                                         |       |        |            |       |       | 24 weeks | Baseline | -0.616   | 0.83     | 1           | -2.663   | 1.432    |
|                                                         |       |        |            |       |       | 48 weeks | Baseline | 0.258    | 0.587    | 1           | -1.191   | 1.707    |
| Role limitations due to physical health <sup>^</sup>    | 3.437 | 96.234 | 0.595      | 0.642 | 0.021 | 48 weeks | Baseline | -0.874   | 0.983    | 1           | -3.299   | 1.552    |
|                                                         |       |        |            |       |       | 24 weeks | Baseline | -0.258   | 0.587    | 1           | -1.707   | 1.191    |
|                                                         |       |        |            |       |       | Baseline | 24 weeks | 0.858    | 2.592    | 1           | -5.538   | 7.255    |
|                                                         |       |        |            |       |       | 48 weeks | Baseline | 2.326    | 3.312    | 1           | -5.848   | 10.501   |
| Role limitations due to emotional problems <sup>^</sup> | 3.279 | 91.81  | 0.708      | 0.562 | 0.025 | 24 weeks | Baseline | -0.858   | 2.592    | 1           | -7.255   | 5.538    |
|                                                         |       |        |            |       |       | 48 weeks | Baseline | 1.468    | 3.758    | 1           | -7.807   | 10.743   |
|                                                         |       |        |            |       |       | 48 weeks | Baseline | -2.326   | 3.312    | 1           | -10.501  | 5.848    |
|                                                         |       |        |            |       |       | 24 weeks | Baseline | -1.468   | 3.758    | 1           | -10.743  | 7.807    |
| Energy/Fatigue                                          | 4     | 112    | 0.125      | 0.973 | 0.004 | Baseline | 24 weeks | -2.75    | 3.547    | 1           | -11.504  | 6.003    |
|                                                         |       |        |            |       |       | 48 weeks | -6.191   | 3.049    | 0.141    | -13.717     | 1.334    |          |
|                                                         |       |        |            |       |       | 24 weeks | Baseline | 2.75     | 3.547    | 1           | -6.003   | 11.504   |
|                                                         |       |        |            |       |       | 48 weeks | Baseline | -3.441   | 2.291    | 0.416       | -9.095   | 2.213    |
| Emotional Wellbeing                                     | 4     | 112    | 0.957      | 0.434 | 0.033 | 48 weeks | Baseline | 6.191    | 3.049    | 0.141       | -1.334   | 13.717   |
|                                                         |       |        |            |       |       | 24 weeks | Baseline | 3.441    | 2.291    | 0.416       | -2.213   | 9.095    |
|                                                         |       |        |            |       |       | Baseline | 24 weeks | 0.118    | 1.597    | 1           | -3.824   | 4.059    |
|                                                         |       |        |            |       |       | 48 weeks | Baseline | -1.938   | 1.337    | 0.459       | -5.239   | 1.363    |
| Social Functioning                                      | 4     | 112    | 0.067      | 0.992 | 0.002 | 24 weeks | Baseline | -0.118   | 1.597    | 1           | -4.059   | 3.824    |
|                                                         |       |        |            |       |       | 48 weeks | Baseline | -2.055   | 1.441    | 0.478       | -5.611   | 1.5      |
|                                                         |       |        |            |       |       | 48 weeks | Baseline | 1.938    | 1.337    | 0.459       | -1.363   | 5.239    |
|                                                         |       |        |            |       |       | 24 weeks | Baseline | 2.055    | 1.441    | 0.478       | -1.5     | 5.611    |
| Pain                                                    | 4     | 112    | 0.313      | 0.869 | 0.011 | Baseline | 24 weeks | -2.128   | 1.239    | 0.275       | -5.187   | 0.931    |
|                                                         |       |        |            |       |       | 48 weeks | -3.361*  | 1.064    | 0.008    | -5.988      | -0.734   |          |
|                                                         |       |        |            |       |       | 24 weeks | Baseline | 2.128    | 1.239    | 0.275       | -0.931   | 5.187    |
|                                                         |       |        |            |       |       | 48 weeks | Baseline | -1.233   | 1.061    | 0.75        | -3.852   | 1.386    |
| General Health <sup>^</sup>                             | 3.265 | 91.413 | 1.875      | 0.134 | 0.063 | 48 weeks | Baseline | 3.361*   | 1.064    | 0.008       | 0.734    | 5.988    |
|                                                         |       |        |            |       |       | 24 weeks | Baseline | 1.233    | 1.061    | 0.75        | -1.386   | 3.852    |
|                                                         |       |        |            |       |       | Baseline | 24 weeks | -0.102   | 2.005    | 1           | -5.051   | 4.847    |
|                                                         |       |        |            |       |       | 48 weeks | Baseline | -1.975   | 1.661    | 0.719       | -6.075   | 2.125    |
| Social Functioning                                      | 4     | 112    | 0.067      | 0.992 | 0.002 | 24 weeks | Baseline | 0.102    | 2.005    | 1           | -4.847   | 5.051    |
|                                                         |       |        |            |       |       | 48 weeks | Baseline | -1.873   | 1.748    | 0.866       | -6.186   | 2.441    |
|                                                         |       |        |            |       |       | 48 weeks | Baseline | 1.975    | 1.661    | 0.719       | -2.125   | 6.075    |
|                                                         |       |        |            |       |       | 24 weeks | Baseline | 1.873    | 1.748    | 0.866       | -2.441   | 6.186    |
| Pain                                                    | 4     | 112    | 0.313      | 0.869 | 0.011 | Baseline | 24 weeks | 0.819    | 1.662    | 1           | -3.282   | 4.92     |
|                                                         |       |        |            |       |       | 48 weeks | -0.564   | 1.736    | 1        | -4.848      | 3.72     |          |
|                                                         |       |        |            |       |       | 24 weeks | Baseline | -0.819   | 1.662    | 1           | -4.92    | 3.282    |
|                                                         |       |        |            |       |       | 48 weeks | Baseline | -1.383   | 1.855    | 1           | -5.96    | 3.194    |
| General Health <sup>^</sup>                             | 3.265 | 91.413 | 1.875      | 0.134 | 0.063 | 48 weeks | Baseline | 0.564    | 1.736    | 1           | -3.72    | 4.848    |
|                                                         |       |        |            |       |       | 24 weeks | Baseline | 1.383    | 1.855    | 1           | -3.194   | 5.96     |
|                                                         |       |        |            |       |       | Baseline | 24 weeks | -1.966   | 1.495    | 0.582       | -5.657   | 1.725    |
|                                                         |       |        |            |       |       | 48 weeks | Baseline | -2.242   | 1.367    | 0.32        | -5.616   | 1.133    |
| General Health <sup>^</sup>                             | 3.265 | 91.413 | 1.875      | 0.134 | 0.063 | 24 weeks | Baseline | 1.966    | 1.495    | 0.582       | -1.725   | 5.657    |
|                                                         |       |        |            |       |       | 48 weeks | Baseline | -0.275   | 0.952    | 1           | -2.626   | 2.075    |
|                                                         |       |        |            |       |       | 48 weeks | Baseline | 2.242    | 1.367    | 0.32        | -1.133   | 5.616    |
|                                                         |       |        |            |       |       | 24 weeks | Baseline | 0.275    | 0.952    | 1           | -2.075   | 2.626    |

Abbreviation: df: degrees of freedom. provided as: between groups, within groups. <sup>^</sup>denotes use of Welch's ANOVA in instances that lack homogeneity of variances. \* $p \leq 0.05$ .

( $F(4, 66) = 3.331, p = 0.015, \eta_p^2 = 0.168$ ; 24w:  $md = 6.765$  (95% CI = 1.315–12.215),  $p = 0.011$ ; 48w:  $md = 8.071$  (95% CI = 3.044–13.098),  $p < 0.001$  Table 3 and Figure 2A), and in measures of General Health for all genders in only the 5 mg group ( $F(1.757, 57.994) = 6.582, p = 0.004, \eta_p^2 = 0.166$ ; 24w:  $md = 5.882$  (95% CI

= 0.388–11.376),  $p = 0.033$ ; 48w:  $md = 5.882$  (95% CI = 1.350–10.415),  $p = 0.007$ ; Figure 2B). Similarly, SF-36 measures of Emotional Well-being improved for all genders after 48 weeks for the 5 mg and placebo groups only (5 mg:  $F(2, 66) = 3.987, p = 0.023, \eta_p^2 = 0.108$ ;  $md = 5.176$  (95% CI = 0.056–10.297),  $p = 0.047$ ; placebo:

**Table 4. Changes in SF-36 self-reported measures of Emotional Well-being and General Health over 48 weeks.**

| Repeated measures ANOVA |                    |                    |        |         |                     |          |          |                 |            | 95% confidence interval |             |             |        |
|-------------------------|--------------------|--------------------|--------|---------|---------------------|----------|----------|-----------------|------------|-------------------------|-------------|-------------|--------|
|                         | df 1               | df 2               | F      | p-value | Partial Eta squared | Time 1   | Time 2   | Mean difference | Std. Error | p-value                 | Lower bound | Upper bound |        |
| Emotional wellbeing     | 10 mg              | 2                  | 60     | 1.789   | 0.176               | 0.056    | Baseline | 24 weeks        | -1.935     | 1.186                   | 0.339       | -4.943      | 1.072  |
|                         |                    |                    |        |         |                     |          |          | 48 weeks        | -1.935     | 1.27                    | 0.414       | -5.156      | 1.285  |
|                         |                    |                    |        |         |                     |          | 24 weeks | Baseline        | 1.935      | 1.186                   | 0.339       | -1.072      | 4.943  |
|                         |                    |                    |        |         |                     |          |          | 48 weeks        | 0          | 1.082                   | 1           | -2.743      | 2.743  |
|                         |                    |                    |        |         |                     |          | 48 weeks | Baseline        | 1.935      | 1.27                    | 0.414       | -1.285      | 5.156  |
|                         |                    |                    |        |         |                     |          |          | 24 weeks        | 0          | 1.082                   | 1           | -2.743      | 2.743  |
|                         | Placebo            | 2                  | 58     | 4.265   | 0.019               | 0.128    | Baseline | 24 weeks        | -2.533     | 1.516                   | 0.316       | -6.385      | 1.319  |
|                         |                    |                    |        |         |                     |          |          | 48 weeks        | -4.267*    | 1.509                   | 0.025       | -8.102      | -0.432 |
|                         |                    |                    |        |         |                     |          | 24 weeks | Baseline        | 2.533      | 1.516                   | 0.316       | -1.319      | 6.385  |
|                         |                    |                    |        |         |                     |          |          | 48 weeks        | -1.733     | 1.379                   | 0.656       | -5.237      | 1.77   |
|                         |                    |                    |        |         |                     |          | 48 weeks | Baseline        | 4.267*     | 1.509                   | 0.025       | 0.432       | 8.102  |
|                         |                    |                    |        |         |                     |          |          | 24 weeks        | 1.733      | 1.379                   | 0.656       | -1.77       | 5.237  |
| 5 mg                    | 2                  | 66                 | 3.987  | 0.023   | 0.108               | Baseline | 24 weeks | -4.471          | 2.121      | 0.128                   | -9.821      | 0.88        |        |
|                         |                    |                    |        |         |                     |          | 48 weeks | -5.176*         | 2.03       | 0.047                   | -10.297     | -0.056      |        |
|                         |                    |                    |        |         |                     | 24 weeks | Baseline | 4.471           | 2.121      | 0.128                   | -0.88       | 9.821       |        |
|                         |                    |                    |        |         |                     |          | 48 weeks | -0.706          | 1.799      | 1                       | -5.243      | 3.831       |        |
|                         |                    |                    |        |         |                     | 48 weeks | Baseline | 5.176*          | 2.03       | 0.047                   | 0.056       | 10.297      |        |
|                         |                    |                    |        |         |                     |          | 24 weeks | 0.706           | 1.799      | 1                       | -3.831      | 5.243       |        |
| 10 mg                   | 1.35 <sup>^</sup>  | 40.509             | 1.805  | 0.186   | 0.057               | Baseline | 24 weeks | -1.452          | 1.943      | 1                       | -6.378      | 3.474       |        |
|                         |                    |                    |        |         |                     |          | 48 weeks | -3.065          | 1.791      | 0.292                   | -7.607      | 1.478       |        |
|                         |                    |                    |        |         |                     | 24 weeks | Baseline | 1.452           | 1.943      | 1                       | -3.474      | 6.378       |        |
|                         |                    |                    |        |         |                     |          | 48 weeks | -1.613          | 0.91       | 0.259                   | -3.919      | 0.693       |        |
|                         |                    |                    |        |         |                     | 48 weeks | Baseline | 3.065           | 1.791      | 0.292                   | -1.478      | 7.607       |        |
|                         |                    |                    |        |         |                     |          | 24 weeks | 1.613           | 0.91       | 0.259                   | -0.693      | 3.919       |        |
| General health          | Placebo            | 1.737 <sup>^</sup> | 50.381 | 1.231   | 0.296               | 0.041    | Baseline | 24 weeks        | -3         | 2.014                   | 0.442       | -8.118      | 2.118  |
|                         |                    |                    |        |         |                     |          |          | 48 weeks        | -0.833     | 2.263                   | 1           | -6.583      | 4.916  |
|                         |                    |                    |        |         |                     |          | 24 weeks | Baseline        | 3          | 2.014                   | 0.442       | -2.118      | 8.118  |
|                         |                    |                    |        |         |                     |          |          | 48 weeks        | 2.167      | 1.584                   | 0.546       | -1.859      | 6.193  |
|                         |                    |                    |        |         |                     |          | 48 weeks | Baseline        | 0.833      | 2.263                   | 1           | -4.916      | 6.583  |
|                         |                    |                    |        |         |                     |          |          | 24 weeks        | -2.167     | 1.584                   | 0.546       | -6.193      | 1.859  |
| 5 mg                    | 1.757 <sup>^</sup> | 57.994             | 6.582  | 0.004   | 0.166               | Baseline | 24 weeks | -5.882*         | 2.178      | 0.033                   | -11.376     | -0.388      |        |
|                         |                    |                    |        |         |                     |          | 48 weeks | -5.882*         | 1.797      | 0.007                   | -10.415     | -1.35       |        |
|                         |                    |                    |        |         |                     | 24 weeks | Baseline | 5.882*          | 2.178      | 0.033                   | 0.388       | 11.376      |        |
|                         |                    |                    |        |         |                     |          | 48 weeks | 0               | 1.594      | 1                       | -4.02       | 4.02        |        |
|                         |                    |                    |        |         |                     | 48 weeks | Baseline | 5.882*          | 1.797      | 0.007                   | 1.35        | 10.415      |        |
|                         |                    |                    |        |         |                     |          | 24 weeks | 0               | 1.594      | 1                       | -4.02       | 4.02        |        |

Abbreviation: df: degrees of freedom. Provided as: between groups, within groups. <sup>^</sup>denotes use of Welch's ANOVA in instances that lack homogeneity of variances. \* $p \leq 0.05$ .

$F(2, 58) = 4.265, p = 0.019, \eta_p^2 = 0.128; md = 4.267$  (95% CI = 0.432–8.102),  $p = 0.025$ ; Figure 2C, Table 4 and Supplementary Table 9). No other significant changes in SF-36 measures were observed.

## DISCUSSION

Few clinical trials to date have evaluated the effects of rapamycin and its derivatives in generally healthy

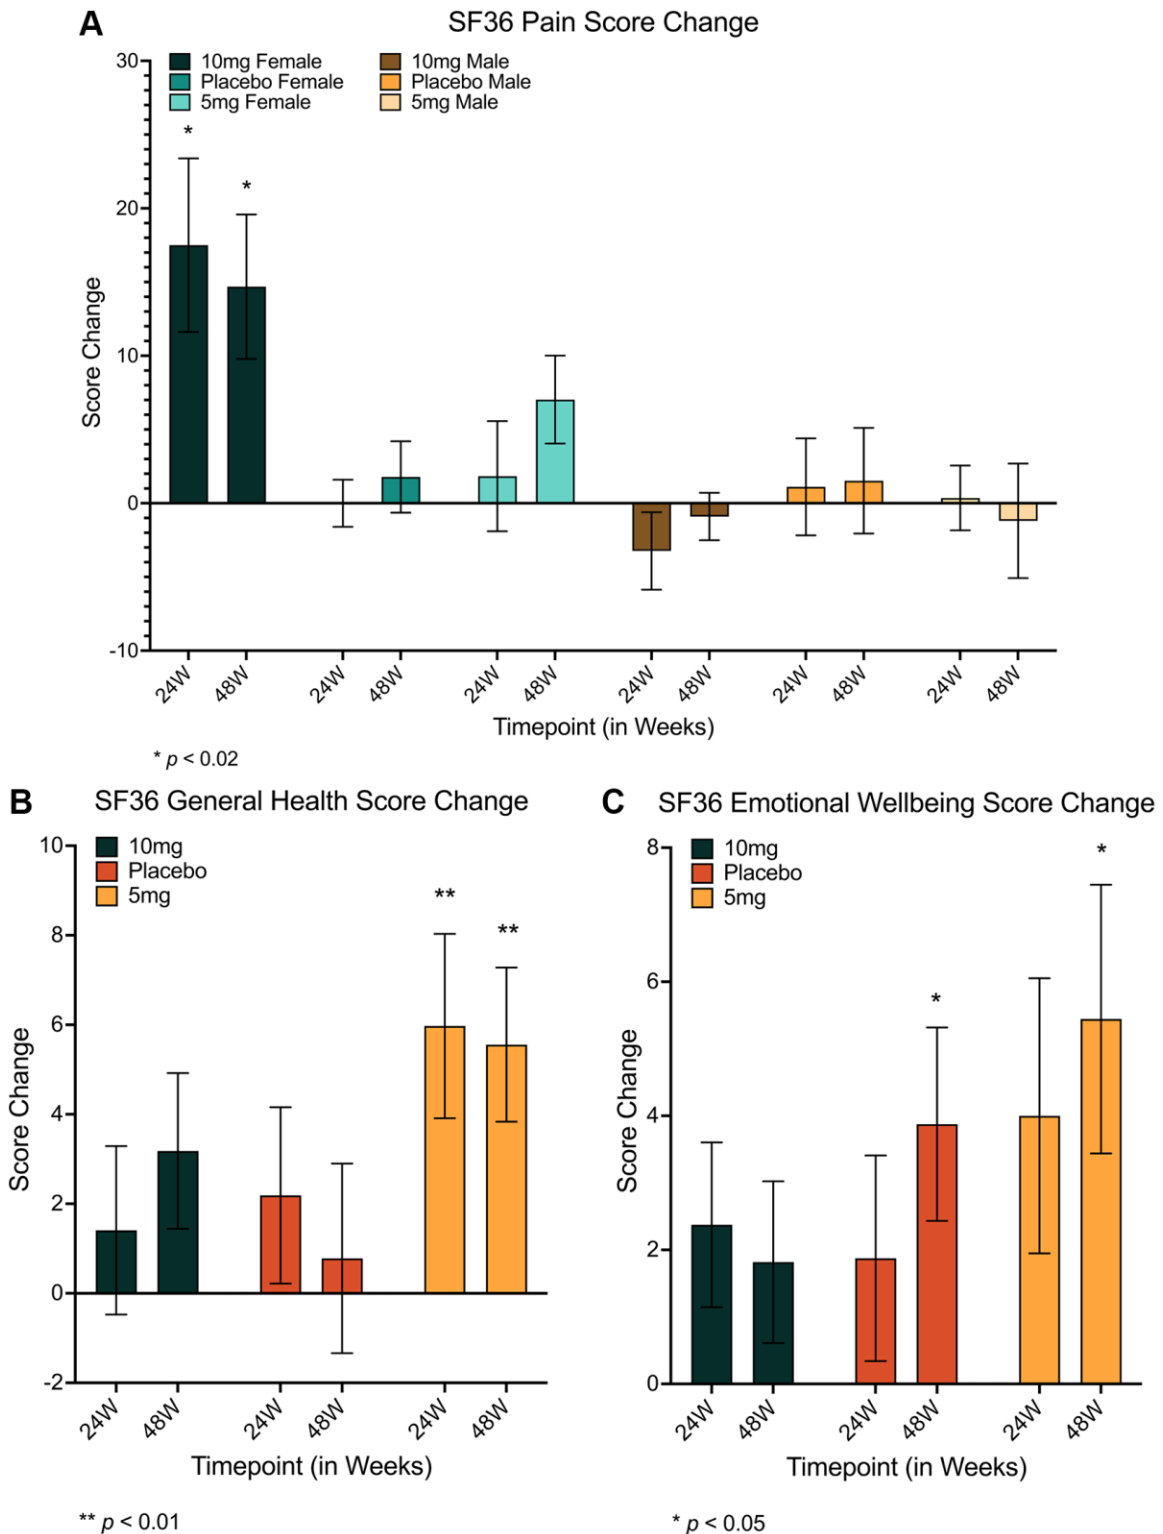

**Figure 2. Changes in self-reported survey scores of quality of life and health.** Females using 10 mg of rapamycin again had significant improvements in self-reported measures of pain at both 24 and 48 weeks (24 weeks:  $md = 6.765$  (95% CI = 1.315–12.215),  $p = 0.011$ ; 48 weeks:  $md = 8.071$  (95% CI = 3.044–13.098),  $p < 0.001$ ) (A). Additionally, improvements in measures of General Health reports were specific to the 5mg rapamycin group, increasing at 24 weeks and remaining relatively constant thereafter (24 weeks:  $md = 5.882$  (95% CI = 0.388–11.376),  $p = 0.033$ ; 48 weeks:  $md = 5.882$  (95% CI = 1.350–10.415),  $p = 0.007$ ) (B), however, improvements in Emotional Wellbeing were only seen for 5mg rapamycin users and placebo groups after 48 weeks (5mg:  $md = 5.176$  (95% CI = 0.056–10.297),  $p = 0.047$ ; placebo:  $md = 4.267$  (95% CI = 0.432–8.102),  $p = 0.025$ ) (C).  $md =$  mean difference, \* $p \leq 0.05$ , \*\* $p \leq 0.01$ . Error bars represent standard error of the mean.

individuals, and those that have been conducted are often challenged by small cohort size, short-term follow-up, or both. While the most robust of these studies have suggested improvements in age-related immune decline in healthy elderly individuals administered low-dose everolimus for 6 to 16 weeks [39], many questions regarding low-dose rapamycin for supporting healthy aging in normative aging individuals remain, particularly regarding the safety of long-term low-dose use. The PEARL trial represents one of the largest efforts to date for evaluating the long-term safety of low-dose rapamycin for longevity in a normative aging cohort, and provides preliminary support for the suggestion that low-dose rapamycin may be useful in combating age-related decline by improving healthspan measures.

The primary goal of the current study was to evaluate the relative safety of low-dose rapamycin use over 48 weeks, and to evaluate whether any clear patterns of concerning side effects emerged in a preliminary cohort. Overall, reports of adverse events (AEs) were relatively consistent across all groups. While rapamycin users appeared to have more GI symptoms than placebo users, no other clear patterns of AEs for rapamycin users emerged. AEs resulting in participant study withdrawal or serious AEs (SAEs) were also similar across groups, with many of the most severe outcomes in the placebo groups. Particular attention was given to immune challenge symptoms for rapamycin users; however, overall reports of cold/flu-like illness and slowed recovery were similar across all groups. There was a single report of anemia in the entire study, in a participant in the 5 mg treatment group. While it resolved with treatment (blood transfusion), did not recur, and the participant completed the entire trial, we highlighted the incidence given interest in this specific outcome for low-dose rapamycin users.

Preliminary investigations of possible efficacy were also explored in this study, however, findings are limited by the small relative cohort size and require both replication and extension before definitive guiding conclusions can be drawn. Specifically, a few key limitations to the study should be noted. First, adherence to the once-weekly dosing schedule was based largely on self-report; missed doses or irregular dosing could have impacted treatment effect. Second, our cohort demographics showed relatively few women and predominantly health-conscious participants, which could mask larger effects in populations with higher baseline adiposity or different lifestyle patterns. Third, only broad measures of diet and activity were captured in self-reports, leaving these factors as a plausible source of unexplained variance in outcomes. Indeed, we hypothesize that the lack of significant differences

between dose groups for our primary outcome measure of visceral adiposity can largely be explained by a combination of these factors. For example, in addition to the cohort size limitations, the participants in this trial were notably health-conscious at baseline (e.g., lower BMI range, healthier diet/exercise habits), which likely limited the potential to detect meaningful VAT changes.

Nonetheless, we saw strong improvements in the secondary outcome measure of lean tissue mass, and in self-reported pain symptoms for women taking 10 mg of compounded rapamycin (equivalent to ~3.33 mgs of generic Sirolimus). We further observed modest improvements in other measures of self-reported well-being for some groups in both genders (general health and emotional well-being). These effects are largely in keeping with the suggested benefits of low-dose rapamycin use in the longevity community, and provide some measure of clinically validated support for rapamycin's reputed effects on this front despite the small sample numbers. Indeed, this may lend even greater support to the likelihood that rapamycin has meaningful longevity benefits, as any evidence of efficacy with such small numbers is decidedly unexpected. While future studies will be required to more fully understand these effects, and should include a broader dosing range as well as a larger cohort, these findings provide a foundation upon which to build further investigation into the health and longevity effects of low-dose rapamycin.

Taken together, findings from the PEARL trial are the largest and longest to date for evaluating the safety and efficacy of low, intermittent "longevity doses" of rapamycin on healthy aging through the measurement of clinically relevant healthspan metrics. Our findings provide evidence that these rapamycin regimens are well tolerated with minimal adverse effects when administered for at least one year within normative aging individuals. Although the lack of significant VAT change (our primary endpoint) indicates that rapamycin may not strongly influence visceral adiposity in this population, we nonetheless observed some benefits for rapamycin users, particularly women, who had significant improvements in lean muscle mass and self-reported pain. While further investigation into low-dose, intermittent rapamycin's longevity effects is undoubtedly required and indeed is ongoing, this study provides evidence that rapamycin taken in this manner is relatively safe, and lays the foundation upon which larger and more detailed studies may be developed in the future. Collectively, this and future work aims to build evidence that beyond merely clinical measures of health improvements, rapamycin may promote essential, comprehensive well-being associated with "adding life to years, not just years to life".

## METHODS

### Study design

The PEARL study was a decentralized, single-center, prospective, double-blind, placebo-controlled trial assessing rapamycin in healthy individuals aged 50–85 years, to determine the safety and efficacy in mitigating aging-related decline (Supplementary Figure 1). It was registered as a clinical trial on 2020-07-28, NCT04488601, and was conducted in accordance with the standards of Good Clinical Practice, as defined by the International Conference on Harmonisation and all applicable federal and local regulations. The study protocol was approved by the institutional review board of the Institute of Regenerative and Cellular Medicine in May 2020 (IRCM; approval number IRCM-2020-252). Discussions with the FDA determined that this study was exempt from IND requirements. To ensure fidelity of the double-blinded design, randomization and dispensing of medications was managed by the distributing pharmacy partner, and kept confidential from the participants and AgelessRx study staff until the trial was concluded.

### Study endpoints

The primary endpoint of this study was changes in visceral fat as measured by dual-energy x-ray absorptiometry (DXA) scan. Secondary endpoints included changes in lean tissue mass and bone density as determined by DXA scan, as well as changes in blood biomarkers from complete blood count (CBC), blood electrolytes, liver function, renal function, serum glucose, insulin, and hemoglobin A1C. Standardized self-reported surveys of quality of life (SF36, [41]) and frailty (WOMAC, [42]) were also completed by study participants, but were not included as specific study endpoints.

### Study population

Participants were recruited and screened for eligibility via the AgelessRx online medical platform. If deemed eligible, informed consent was obtained for participation in the study. Participants were eligible for the study if they were aged between 50 and 85 years at the start of the study, were interested in taking rapamycin off-label, were willing to undergo minimally invasive tests, and were in good health or had well-managed clinically-stable chronic diseases. Participants were excluded from the study if they had anemia, neutropenia, or thrombocytopenia, were premenopausal, were scheduled to undergo major surgery in next 12 months, were undergoing or were scheduled to undergo chemotherapy, were scheduled for immunosuppressant

therapy for an organ transplant, had impaired wound healing or history of chronic open wound, untreated dyslipidemia, impaired hepatic function, chronic infections requiring ongoing treatment or monitoring (e.g., human immunodeficiency virus/acquired immunodeficiency syndrome, chronic Lyme disease), allergy to rapamycin, clinically-relevant primary or secondary immune dysfunction or deficiency, chronic oral corticosteroid or immunosuppressive medication use, fibromyalgia, chronic fatigue syndrome/myalgic encephalomyelitis, breast implant illness, congestive heart failure, impaired renal function, poorly controlled diabetes, type I or insulin-dependent type II diabetes, untreated or treated within the last five years for substance abuse disorder, and untreated or poorly controlled mental health disorder. Further, those who had recently taken or were taking metformin, rapamycin, or rapalogs were excluded unless the participant agreed to a 6-month washout period prior to the start of the trial.

### Treatments

Rapamycin used in this study was a compounded formulation of 5 mg or 10 mg, received from Belmar Pharma Solutions (Golden, CO, USA). Placebo capsules were also formulated by Belmar, and were designed to have a similar appearance to rapamycin capsules. Both were taken orally. Study participants were randomized into three groups by the Belmar Pharmacy Solutions staff who dispensed medications accordingly: receiving 5 mg of compounded rapamycin, 10 mg of compounded rapamycin, or placebo, once per week by mouth. Participants were instructed to take the medication with or without food. Study participants were prescribed the drug for 48 weeks upon enrollment in the study and were dispensed supplies for 12 weeks at a time. Both participants and AgelessRx research staff were blinded to the randomization assignments until the trial was completed. After completion and unblinding of the trial, participants receiving the placebo were given 1 year of no-cost compounded rapamycin if desired, and were monitored for any adverse side effects.

### Assessments

All assessments were performed for all randomization groups at baseline, after 24 weeks, and after 48 weeks of rapamycin treatment, and included comprehensive blood testing, DXA body composition scans, and established self-report surveys (SF36 and WOMAC scales). Testing was overseen by AgelessRx staff blinded to participant randomization group until the trial was completed. Safety-based blood testing (including Triglycerides, Total Cholesterol, LDL-Cholesterol,



Glucose, Creatinine, ALT, WBC, RBC, Hemoglobin, Hemoglobin A1C, and ApoB) was performed two additional times (at 2 weeks and 4 weeks of treatment for all markers except Hemoglobin A1C and ApoB, which were limited to baseline, 24 weeks, and 48 weeks) to evaluate safety. All blood testing was performed by local Quest Diagnostics or LabCorp laboratories, and included complete blood count (CBC), comprehensive metabolic panel, liver function tests, renal function tests, lipid panels, and insulin/glucose monitoring panels. Participants were asked to fast the night before blood draws.

DXA scans were performed by designated partner facilities DexaFit and Fitnesscity at locations convenient for the participants, and were used to measure visceral adiposity, bone density (from both bone mineral content and bone mineral density), and lean tissue mass. AgelessRx staff assisted participants in finding and scheduling appointments at these facilities as needed. For participants for whom neither partner facility had a convenient nearby location, alternative facilities were identified in conjunction with the AgelessRx staff. For all DXA scan facilities, scans were completed by trained technicians familiar with equipment calibration and function, appropriate patient positioning, and necessary safety protocols. For all participants, the following procedures were used:

Pre-Scan, participants were advised to avoid calcium supplements and certain medications for 24–48 hours before the scan to prevent interference with results. They were asked to avoid exercise prior to the scan and come in well-hydrated. Additionally, they need to fast 2–3 hours prior to their scan, and inform the technician of any recent surgeries, fractures, or medical conditions that may impact the scan. During the scan, they were asked to wear loose, metal-free clothing, and to remove metal objects such as jewelry or belts to avoid artifacts.

All DXA measures are obtained by comparing the X-ray attenuation in the designated region or tissue type. Measurements are reported in grams or grams per cm<sup>2</sup>. Results are compared to those of national averages for a participant's given age, gender, and race.

Measures of gut microbiome health were evaluated using the at-home Thorne Gut Health test (Thorne), and measures of epigenetic age were evaluated using the at-home TruDiagnostic TruAge kit (TruDiagnostic). Results were provided with the kit, and interpreted versions were returned to AgelessRx researchers for correlation and comparison with dosing groups and other measures reported in this manuscript.

Health-related QoL was assessed using electronic versions of standardized, validated surveys. The Short-Form 36 (SF-36) survey, which consists of 36 questions covering eight health domains, was used to assess physical functioning, role limitations due to physical health, bodily pain, general health perceptions, vitality (energy levels), social functioning, role limitations due to emotional problems, and emotional health [41]. The responses were scored and summarized to provide a profile of an individual's perceived health status. Pain, fitness, and functional limitations were further assessed using the Western Ontario and McMaster Universities Osteoarthritis (WOMAC) index, which is a questionnaire that is commonly used to assess the health status of individuals with osteoarthritis of the hip and knee [42]. It consists of 24 items divided into three subscales: pain, stiffness, and physical function. The responses are scored to provide quantitative assessments of the severity of symptoms and functional limitations associated with osteoarthritis.

#### **Participant protocol adherence, data quality control and adverse event monitoring**

At the onset of the trial participants receive an emailed copy of a participant guide that included general instructions on getting started and important timepoints. Participants were monitored routinely throughout the study through weekly email surveys and 4 virtual meetings at regular timepoints throughout the trial. They were asked to schedule all 4× virtual check-in meetings (via Calendly) with clinical trial staff at the time of onboarding. These meetings were conducted in 2 weeks (after 1st dose date), 4 weeks, 6 months, and the final 12-months. During these meetings, any outstanding items that participants had not yet completed would be reviewed and documented. Items included verifying weekly administration of their medication, completing weekly check-in surveys (WOMAC, SF36, adverse events, etc.), completing at-home kits (as relevant), scheduling and completing Quest blood draws as required, and completing DXA scans as required. All participant tasks, check-ins, adverse event reporting, and ongoing participant support during the study were tracked and conducted by a contract research organization and an internal project manager, all of whom remained blinded to the treatment condition participants had been assigned to by the pharmacy until the trial was completed. Clinical trial staff had internal project management sheets to monitor participants and their scheduled tasks, as they progressed through the trial. Participants were emailed in a timely manner to ensure participant compliance with intervention regimen and tasks were



completed, inform of upcoming tasks and provide support as needed. Any missed meetings due to participant schedule conflicts/no-shows/cancellations would be re-scheduled or followed up in a timely manner with participants to ensure trial compliance and support as needed.

Adverse events (AEs) were obtained through weekly monitoring forms sent out to participants. Clinical trial staff reviewed and documented all AEs, and conferred with medical staff as necessary to determine if individuals should be removed from the study for any specific AEs or serious AEs. A full list of AEs, withdrawn patients, and SAEs is presented in Supplementary Table 3 and Supplementary File 2.

### Statistical analysis

Data were analyzed using tests as described in the text, with relevant corrections for sphericity (Greenhouse-Geisser), homogeneity of variance (Welch's test), and multiple comparisons (Bonferroni or Games-Howell correction), unless otherwise noted. All analyses were conducted using SPSS 29.0.2.0 (IBM, Armonk, NY, USA). Not all participants completed all data points, thus in some tests, the number of cases will differ from the total number of study participants. For each test, the maximum number of datapoints was utilized for comparisons, with pairwise removal for missing values.

### AUTHOR CONTRIBUTIONS

Virginia Lee, Andy Nyquist, Anar Isman, and Sajad Zalzal designed and implemented the study. Girish Harinath, Mauricio Moel, and Stefanie Morgan performed data analysis. Girish Harinath, Virginia Lee, Andy Nyquist, Mauricio Moel, Stefanie Morgan, Anar Isman, and Sajad Zalzal wrote and edited the manuscript. All work was supervised by Stefanie Morgan, Anar Isman, and Sajad Zalzal. The corresponding author is Stefanie Morgan.

### ACKNOWLEDGMENTS

The authors would like to thank the participants who took part in this study. Clinical trial oversight was conducted by PHAGE corporation. We extend special thanks to Mikhail Blagosklonny, James Watson, Alan Green and Thorne for their participation and support in conducting this trial.

### CONFLICTS OF INTEREST

GH, VL, AN, MM, SM, AI, and SZ are employees and shareholders of AgelessRx.

## ETHICAL STATEMENT AND CONSENT

This study was registered as a clinical trial on 2020-07-28, NCT04488601, and was conducted in accordance with the standards of Good Clinical Practice, as defined by the International Conference on Harmonisation and all applicable federal and local regulations. The study protocol was approved by the institutional review board of the Institute of Regenerative and Cellular Medicine in May 2020 (IRCM; approval number IRCM-2020-252). Discussions with the FDA determined that this study was exempt from IND requirements. Written informed consent was obtained for all participants.

## FUNDING

Funding for the study came primarily from donors via a Lifespan.io crowdfunding effort, with significant donations from Vitalik Buterin, Micah Zoltu, Brad Armstrong, and anonymous gifts. Administrative and trial support, article publishing charges, and other fees were provided by AgelessRx.

## REFERENCES

1. Al-Maskari F. Lifestyle diseases: An Economic Burden on the Health Services. 2024. <http://www.un.org/en/chronicle/article/lifestyle-diseases-economic-burden-health-services#:~:text=By%202030%2C%20the%20proportion%20of,African%20and%20Eastern%20Mediterranean%20regions.>
2. Ford ES, Bergmann MM, Kröger J, Schienkiewitz A, Weikert C, Boeing H. Healthy living is the best revenge: findings from the European Prospective Investigation Into Cancer and Nutrition-Potsdam study. *Arch Intern Med.* 2009; 169:1355–62. <https://doi.org/10.1001/archinternmed.2009.237> PMID:19667296
3. Kvaavik E, Batty GD, Ursin G, Huxley R, Gale CR. Influence of individual and combined health behaviors on total and cause-specific mortality in men and women: the United Kingdom health and lifestyle survey. *Arch Intern Med.* 2010; 170:711–8. <https://doi.org/10.1001/archinternmed.2010.76> PMID:20421558
4. Coe E, Dewhurst M, Hartenstein L, Hextall A, Latkovic T. At least six years of higher quality life for everyone is within reach. Adding years to life and life to years. 2022.
5. Garmany A, Yamada S, Terzic A. Longevity leap: mind the healthspan gap. *NPJ Regen Med.* 2021; 6:57. <https://doi.org/10.1038/s41536-021-00169-5> PMID:34556664

6. Sierra F. The Emergence of Geroscience as an Interdisciplinary Approach to the Enhancement of Health Span and Life Span. *Cold Spring Harb Perspect Med.* 2016; 6:a025163.  
<https://doi.org/10.1101/cshperspect.a025163>  
PMID:[26931460](https://pubmed.ncbi.nlm.nih.gov/26931460/)
7. Kulkarni AS, Aleksic S, Berger DM, Sierra F, Kuchel GA, Barzilai N. Geroscience-guided repurposing of FDA-approved drugs to target aging: A proposed process and prioritization. *Aging Cell.* 2022; 21:e13596.  
<https://doi.org/10.1111/acer.13596>  
PMID:[35343051](https://pubmed.ncbi.nlm.nih.gov/35343051/)
8. Kaeberlein TL, Green AS, Haddad G, Hudson J, Isman A, Nyquist A, Rosen BS, Suh Y, Zalzal S, Zhang X, Blagosklonny MV, An JY, Kaeberlein M. Evaluation of off-label rapamycin use to promote healthspan in 333 adults. *Geroscience.* 2023; 45:2757–68.  
<https://doi.org/10.1007/s11357-023-00818-1>  
PMID:[37191826](https://pubmed.ncbi.nlm.nih.gov/37191826/)
9. Mannick JB, Lamming DW. Targeting the biology of aging with mTOR inhibitors. *Nat Aging.* 2023; 3:642–60.  
<https://doi.org/10.1038/s43587-023-00416-y>  
PMID:[37142830](https://pubmed.ncbi.nlm.nih.gov/37142830/)
10. Chung J, Kuo CJ, Crabtree GR, Blenis J. Rapamycin-FKBP specifically blocks growth-dependent activation of and signaling by the 70 kd S6 protein kinases. *Cell.* 1992; 69:1227–36.  
[https://doi.org/10.1016/0092-8674\(92\)90643-g](https://doi.org/10.1016/0092-8674(92)90643-g)  
PMID:[1377606](https://pubmed.ncbi.nlm.nih.gov/1377606/)
11. Castilho RM, Squarize CH, Chodosh LA, Williams BO, Gutkind JS. mTOR mediates Wnt-induced epidermal stem cell exhaustion and aging. *Cell Stem Cell.* 2009; 5:279–89.  
<https://doi.org/10.1016/j.stem.2009.06.017>  
PMID:[19733540](https://pubmed.ncbi.nlm.nih.gov/19733540/)
12. Urfer SR, Kaeberlein TL, Mailheau S, Bergman PJ, Creevy KE, Promislow DEL, Kaeberlein M. A randomized controlled trial to establish effects of short-term rapamycin treatment in 24 middle-aged companion dogs. *Geroscience.* 2017; 39:117–27.  
<https://doi.org/10.1007/s11357-017-9972-z>  
PMID:[28374166](https://pubmed.ncbi.nlm.nih.gov/28374166/)
13. Robida-Stubbs S, Glover-Cutter K, Lamming DW, Mizunuma M, Narasimhan SD, Neumann-Haefelin E, Sabatini DM, Blackwell TK. TOR signaling and rapamycin influence longevity by regulating SKN-1/Nrf and DAF-16/FoxO. *Cell Metab.* 2012; 15:713–24.  
<https://doi.org/10.1016/j.cmet.2012.04.007>  
PMID:[22560223](https://pubmed.ncbi.nlm.nih.gov/22560223/)
14. Miller RA, Harrison DE, Astle CM, Fernandez E, Flurkey K, Han M, Javors MA, Li X, Nadon NL, Nelson JF, Pletcher S, Salmon AB, Sharp ZD, et al. Rapamycin-mediated lifespan increase in mice is dose and sex dependent and metabolically distinct from dietary restriction. *Aging Cell.* 2014; 13:468–77.  
<https://doi.org/10.1111/acer.12194>  
PMID:[24341993](https://pubmed.ncbi.nlm.nih.gov/24341993/)
15. Juricic P, Lu YX, Leech T, Drews LF, Paulitz J, Lu J, Nespital T, Azami S, Regan JC, Funk E, Fröhlich J, Grönke S, Partridge L. Long-lasting geroprotection from brief rapamycin treatment in early adulthood by persistently increased intestinal autophagy. *Nat Aging.* 2022; 2:824–36.  
<https://doi.org/10.1038/s43587-022-00278-w>  
PMID:[37118497](https://pubmed.ncbi.nlm.nih.gov/37118497/)
16. Bitto A, Ito TK, Pineda VV, LeTexier NJ, Huang HZ, Sutlief E, Tung H, Vizzini N, Chen B, Smith K, Meza D, Yajima M, Beyer RP, et al. Transient rapamycin treatment can increase lifespan and healthspan in middle-aged mice. *Elife.* 2016; 5:e16351.  
<https://doi.org/10.7554/eLife.16351>  
PMID:[27549339](https://pubmed.ncbi.nlm.nih.gov/27549339/)
17. Barnett BG, Wesselowski SR, Gordon SG, Saunders AB, Promislow DEL, Schwartz SM, Chou L, Evans JB, Kaeberlein M, Creevy KE. A masked, placebo-controlled, randomized clinical trial evaluating safety and the effect on cardiac function of low-dose rapamycin in 17 healthy client-owned dogs. *Front Vet Sci.* 2023; 10:1168711.  
<https://doi.org/10.3389/fvets.2023.1168711>  
PMID:[37275618](https://pubmed.ncbi.nlm.nih.gov/37275618/)
18. Arriola Apelo SI, Pumper CP, Baar EL, Cummings NE, Lamming DW. Intermittent Administration of Rapamycin Extends the Life Span of Female C57BL/6J Mice. *J Gerontol A Biol Sci Med Sci.* 2016; 71:876–81.  
<https://doi.org/10.1093/gerona/glw064>  
PMID:[27091134](https://pubmed.ncbi.nlm.nih.gov/27091134/)
19. Powers RW 3rd, Kaeberlein M, Caldwell SD, Kennedy BK, Fields S. Extension of chronological life span in yeast by decreased TOR pathway signaling. *Genes Dev.* 2006; 20:174–84.  
<https://doi.org/10.1101/gad.1381406>  
PMID:[16418483](https://pubmed.ncbi.nlm.nih.gov/16418483/)
20. Colman RJ, Anderson RM, Johnson SC, Kastman EK, Kosmatka KJ, Beasley TM, Allison DB, Cruzen C, Simmons HA, Kemnitz JW, Weindruch R. Caloric restriction delays disease onset and mortality in rhesus monkeys. *Science.* 2009; 325:201–4.  
<https://doi.org/10.1126/science.1173635>  
PMID:[19590001](https://pubmed.ncbi.nlm.nih.gov/19590001/)
21. Harrison DE, Strong R, Sharp ZD, Nelson JF, Astle CM, Flurkey K, Nadon NL, Wilkinson JE, Frenkel K, Carter CS, Pahor M, Javors MA, Fernandez E, Miller RA. Rapamycin fed late in life extends lifespan in

- genetically heterogeneous mice. *Nature*. 2009; 460:392–5.  
<https://doi.org/10.1038/nature08221>  
PMID:[19587680](https://pubmed.ncbi.nlm.nih.gov/19587680/)
22. Miller RA, Harrison DE, Astle CM, Baur JA, Boyd AR, de Cabo R, Fernandez E, Flurkey K, Javors MA, Nelson JF, Orihuela CJ, Pletcher S, Sharp ZD, et al. Rapamycin, but not resveratrol or simvastatin, extends life span of genetically heterogeneous mice. *J Gerontol A Biol Sci Med Sci*. 2011; 66:191–201.  
<https://doi.org/10.1093/gerona/glq178>  
PMID:[20974732](https://pubmed.ncbi.nlm.nih.gov/20974732/)
23. Flynn JM, O'Leary MN, Zambataro CA, Academia EC, Presley MP, Garrett BJ, Zykovich A, Mooney SD, Strong R, Rosen CJ, Kapahi P, Nelson MD, Kennedy BK, Melov S. Late-life rapamycin treatment reverses age-related heart dysfunction. *Aging Cell*. 2013; 12:851–62.  
<https://doi.org/10.1111/acer.12109>  
PMID:[23734717](https://pubmed.ncbi.nlm.nih.gov/23734717/)
24. Selvarani R, Mohammed S, Richardson A. Effect of rapamycin on aging and age-related diseases-past and future. *Geroscience*. 2021; 43:1135–58.  
<https://doi.org/10.1007/s11357-020-00274-1>  
PMID:[33037985](https://pubmed.ncbi.nlm.nih.gov/33037985/)
25. Zhang Y, Zhang J, Wang S. The Role of Rapamycin in Healthspan Extension via the Delay of Organ Aging. *Ageing Res Rev*. 2021; 70:101376.  
<https://doi.org/10.1016/j.arr.2021.101376>  
PMID:[34089901](https://pubmed.ncbi.nlm.nih.gov/34089901/)
26. RapAdmin: Breaking: 15% Healthy Lifespan improvement via Rapamycin seen in Marmosets. <https://www.rapamycin.news/t/breaking-15-healthy-lifespan-improvement-via-rapamycin-seen-in-marmosets/14325>. Accessed. 2024.
27. Weston AD, Grossardt BR, Garner HW, Kline TL, Chamberlain AM, Allen AM, Erickson BJ, Rocca WA, Rule AD, St Sauver JL. Abdominal Body Composition Reference Ranges and Association With Chronic Conditions in an Age-and Sex-Stratified Representative Sample of a Geographically Defined American Population. *J Gerontol A Biol Sci Med Sci*. 2024; 79:glae055.  
<https://doi.org/10.1093/gerona/glac055>  
PMID:[38373180](https://pubmed.ncbi.nlm.nih.gov/38373180/)
28. Hunter GR, Gower BA, Kane BL. Age Related Shift in Visceral Fat. *Int J Body Compos Res*. 2010; 8:103–8.  
PMID:[24834015](https://pubmed.ncbi.nlm.nih.gov/24834015/)
29. Volpi E, Nazemi R, Fujita S. Muscle tissue changes with aging. *Curr Opin Clin Nutr Metab Care*. 2004; 7:405–10.  
<https://doi.org/10.1097/01.mco.0000134362.76653.b2>  
PMID:[15192443](https://pubmed.ncbi.nlm.nih.gov/15192443/)
30. Whitaker KM, Choh AC, Lee M, Towne B, Czerwinski SA, Demerath EW. Sex differences in the rate of abdominal adipose accrual during adulthood: the Fels Longitudinal Study. *Int J Obes (Lond)*. 2016; 40:1278–85.  
<https://doi.org/10.1038/ijo.2016.48>  
PMID:[27005404](https://pubmed.ncbi.nlm.nih.gov/27005404/)
31. Berger C, Langsetmo L, Joseph L, Hanley DA, Davison KS, Josse R, Kreiger N, Tenenhouse A, Goltzman D, and Canadian Multicentre Osteoporosis Study Research Group. Change in bone mineral density as a function of age in women and men and association with the use of antiresorptive agents. *CMAJ*. 2008; 178:1660–8.  
<https://doi.org/10.1503/cmaj.071416>  
PMID:[18559803](https://pubmed.ncbi.nlm.nih.gov/18559803/)
32. Alswat KA. Gender Disparities in Osteoporosis. *J Clin Med Res*. 2017; 9:382–7.  
<https://doi.org/10.14740/jocmr2970w>  
PMID:[28392857](https://pubmed.ncbi.nlm.nih.gov/28392857/)
33. Mikkola TM, Kautiainen H, von Bonsdorff MB, Salonen MK, Wasenius N, Kajantie E, Eriksson JG. Body composition and changes in health-related quality of life in older age: a 10-year follow-up of the Helsinki Birth Cohort Study. *Qual Life Res*. 2020; 29:2039–50.  
<https://doi.org/10.1007/s11136-020-02453-1>  
PMID:[32124264](https://pubmed.ncbi.nlm.nih.gov/32124264/)
34. Chlabicz M, Dubatówka M, Jamiołkowski J, Sowa P, Łapińska M, Raczkowski A, Łaguna W, Moniuszko-Malinowska AM, Waszkiewicz N, Kowalska I, Kamiński KA. Subjective well-being in non-obese individuals depends strongly on body composition. *Sci Rep*. 2021; 11:21797.  
<https://doi.org/10.1038/s41598-021-01205-6>  
PMID:[34750456](https://pubmed.ncbi.nlm.nih.gov/34750456/)
35. Lin H, Salech F, Lim A, Vogrin S, Duque G. The effect of rapamycin and its analogues on age-related musculoskeletal diseases: a systematic review. *Aging Clin Exp Res*. 2022; 34:2317–33.  
<https://doi.org/10.1007/s40520-022-02190-0>  
PMID:[35861940](https://pubmed.ncbi.nlm.nih.gov/35861940/)
36. den Hartigh LJ, Goodspeed L, Wang SA, Kenerson HL, Omer M, O'Brien KD, Ladiges W, Yeung R, Subramanian S. Chronic oral rapamycin decreases adiposity, hepatic triglycerides and insulin resistance in male mice fed a diet high in sucrose and saturated fat. *Exp Physiol*. 2018; 103:1469–80.  
<https://doi.org/10.1113/EP087207>  
PMID:[30117227](https://pubmed.ncbi.nlm.nih.gov/30117227/)
37. Konopka AR, Lamming DW. RAP PAC Investigators, and EVERLAST Investigators. Blazing a trail for the clinical use of rapamycin as a geroprotector. *Geroscience*. 2023; 45:2769–83.  
<https://doi.org/10.1007/s11357-023-00935-x>  
PMID:[37801202](https://pubmed.ncbi.nlm.nih.gov/37801202/)

38. Mannick JB, Del Giudice G, Lattanzi M, Valiante NM, Praestgaard J, Huang B, Lonetto MA, Maecker HT, Kovarik J, Carson S, Glass DJ, Klickstein LB. mTOR inhibition improves immune function in the elderly. *Sci Transl Med*. 2014; 6:268ra179.  
<https://doi.org/10.1126/scitranslmed.3009892>  
PMID:[25540326](https://pubmed.ncbi.nlm.nih.gov/25540326/)
39. Mannick JB, Morris M, Hockey HP, Roma G, Beibel M, Kulmatycki K, Watkins M, Shavlakadze T, Zhou W, Quinn D, Glass DJ, Klickstein LB. TORC1 inhibition enhances immune function and reduces infections in the elderly. *Sci Transl Med*. 2018; 10:eaq1564.  
<https://doi.org/10.1126/scitranslmed.aag1564>  
PMID:[29997249](https://pubmed.ncbi.nlm.nih.gov/29997249/)
40. Harinath G, Lee V, Nyquist A, Moel M, Wouters M, Hagemeyer J, Verkennes B, Tacubao C, Nasher S, Kauppi K, Morgan SL, Isman A, Zalzal S. The bioavailability and blood levels of low-dose rapamycin for longevity in real-world cohorts of normative aging individuals. *Geroscience*. 2025. [Epub ahead of print].  
<https://doi.org/10.1007/s11357-025-01532-w>  
PMID:[39873920](https://pubmed.ncbi.nlm.nih.gov/39873920/)
41. Ware JE Jr, Sherbourne CD. The MOS 36-item short-form health survey (SF-36). I. Conceptual framework and item selection. *Med Care*. 1992; 30:473–83.  
PMID:[1593914](https://pubmed.ncbi.nlm.nih.gov/1593914/)
42. Riddle DL, Perera RA. The WOMAC Pain Scale and Crosstalk From Co-occurring Pain Sites in People With Knee Pain: A Causal Modeling Study. *Phys Ther*. 2020; 100:1872–81.  
<https://doi.org/10.1093/ptj/pzaa098>  
PMID:[32453429](https://pubmed.ncbi.nlm.nih.gov/32453429/)

## SUPPLEMENTARY MATERIALS

### Supplementary Files

#### Supplementary File 1. Baseline differences in participant measures.

We noted that at baseline, ANOVA (with Bonferroni corrected post-hoc testing, unless otherwise noted) suggested that participants in the 10 mg group had significantly higher scores on SF-36 self-report survey measures of both emotional well-being ( $F(2, 110) = 4.083, p = 0.019, \varepsilon^2 = 0.052; md = 7.667$  (95% CI = 0.970–14.364),  $p = 0.019$ ) and role limitations due to emotional problems (Welch's ANOVA  $F(2, 60.793) = 4.103, p = 0.021, \omega^2 = 0.065$ ; Games-Howell  $md = 10.653$  (95% CI = 0.706–20.599),  $p = 0.033$ ; Supplementary Table 3). Similarly, the 5mg group had a slightly lower hemoglobin A1C than placebo at baseline (by ANOVA with Bonferroni corrected post-hoc tests,  $F(2, 106) = 3.418, p = 0.036, \varepsilon^2 = -0.015; md = -0.1497$  (95% CI = -0.289–0.010),  $p = 0.031$ ), despite self-reporting less moderate activity (with Welch's ANOVA and Games-Howell post hoc tests,  $F(2, 65.313) = 5.315, p = 0.007, \omega^2 = 0.076; md = -0.568$  (95% CI = -1.07–-0.070),  $p = 0.023$ ), and had a significantly lower baseline measure of bone mineral density by DXA scan ( $F(2, 70.147) = 4.250, p = 0.018, \omega^2 = 0.104$ ) relative to both 10 mg ( $md = -0.19684$  (95% CI = -0.3492–0.0345),  $p = 0.014$ ) and placebo groups ( $md = -0.16915$  (95% CI = -0.3333–0.0049),  $p = 0.042$ ; Supplementary Table 3).

#### Supplementary File 2. AE and SAE report detail.

##### Withdrawn:

- 10 mg
  - Participant experienced a sore throat and low-grade fever (~100°F) approximately 24 hours after their first dose, which improved after a few days. They had a prior respiratory infection before the dose. They also reported one small acne spot and a canker sore that resolved quickly. Further survey responses indicated new acne, a canker sore, and gastrointestinal (GI) issues, specifically a “burning sensation in the stomach and nausea,” along with a sore throat, cough, and earache. These symptoms typically began a few days after taking the capsule and lasted 2–3 days.
  - A pharmacy error resulted in the participant receiving a full dose instead of the intended half dose. After meeting with clinical trial associates, the correct half dose was sent for future administration, but only after the participant's symptoms were resolved. For statistical analysis, the following events will be documented separately: general cold/flu with GI symptoms, acne, canker sore, and a second GI event.
  - During a routine check-in, the participant reported the return of GI symptoms (burning sensation) 3–4 weeks after taking the half dose. They decided to discontinue the treatment and withdraw from the trial.
- Placebo
  - Participant reported gastrointestinal (GI) symptoms including loose stools, increased flatulence, up to three bowel movements per day, vague central abdominal pain, malaise, and lack of energy. They also noted a decline in hip health (pain and mobility issues), which had previously improved, and an increase in blood pressure (from 113/78 to 130/85). There were no fever or other symptoms, but these issues affected their ability to work and exercise. The participant had a history of gastroenteritis and ulcers, and a clear colonoscopy from December 2021. They attempted a 36-hour fast and a short course of over-the-counter proton pump inhibitors (PPIs), neither of which resolved the symptoms. They also engaged in intensive physical therapy for the hip problems but did not seek a provider for further diagnostics.
  - After speaking with trial staff, the participant agreed to discontinue Rapamycin. Follow-up surveys indicated steady improvement in their GI symptoms, with resolution. However, the participant expressed reluctance to restart the medication and requested to withdraw from the trial.
- Placebo
  - Participant reported “Cough, Mild pains, Headache” via survey. Follow-up reported COVID-19 positive result. Staff requested participant follow CDC guidelines and delay 4-week Quest panel. Next survey reported: “Congestion, Cough, Fever, GI, Mild pains, Respiratory, Headache, Joints, Tightness in breath, Felt I couldn't digest”. Follow-up confirms no symptoms for 06/2022 Quest panel.
  - Participant reported “Skin, Blistering/Irritation/ Itching/Reddening” via survey. Participant reported bruising more than usual without memorable cause and a rash/cut on the hand not healing as the participant expects. Upon follow-up, Participant requested to withdraw and was asked to schedule a debriefing appointment.



- 06/2022 follow-up reports “eye pain” like “sand in the eye” with painful blinking. Potentially if the rash on hand was infectious, it could have infected eye. Participant has not sought medical attention from a PHP, dermatologist, ophthalmologist, or urgent care. However, all symptoms have been resolved.
- 10 mg
  - Participant reported a need of small bladder stone removed in the future. Participant did not report any symptoms when staff asked to describe them. Participant confirmed that their urologist saw the stone during a BPH check-up and advised removal.
  - Participant expressed desire to withdraw due to assumption of being on placebo.
- Placebo
  - Participant noted increase in balance issues during Week 2 check-in.
  - Participant noted a pre-existing condition being treated that results in “balance issues”. No medical conditions were noted in the PHP Screening documentation. Participant was asked to note when the issue changes in frequency/severity.
  - Participant reports Neurological/Behavioral issues, Dizziness, Slurred speech, Faintness/Lightheadedness via survey. Symptoms appear to be a flare of the condition previously mentioned.
  - Participant withdrawing as of 01/2023 due to desire to be sure they are not on placebo.
- 5 mg
  - No AE just wanted to withdraw with spouse
- Placebo
  - Participant reports tinnitus via survey. Participant follow confirms tinnitus and hearing loss Dx prior to starting the trial. No treatments or lifestyle changes noted. Participant noted symptoms on survey due to “resurfacing” of symptoms. Participant notified of the possibility of permanent hearing loss due to Rapamycin. Participant was advised to keep a close eye on symptoms and follow up with audiologist regularly to prevent permanent issues.
  - Participant reports severe muscle and bone pain. Follow-up confirms the issue began 3 years ago but has been worsening. Participant underwent MRI and was Dx with avascular necrosis and will require hip replacement surgery.
  - Participant decided to withdraw due to new Dx and Tx plan. Staff support decision for best outcomes.
- 10 mg
  - Participant reports an “unnamed pathogen..., abnormal DNA and several markers for inflammation” was found in their Baseline Thorne gut health kit. Participant was advised to seek treatment from the primary care and report any new prescriptions.
  - No symptoms were reported. Therefore, no adverse event has occurred.
  - Participant reports post-COVID-19 symptoms via email. Follow-up reports no positive COVID-19 test and did not provide possible date of exposure, as requested. Unknown if acute symptoms occur before or after the first dose, due to lack of response. Participant confirms a “very high” C-reactive protein level, which increases with flu, COVID-19, and most any viral infection.
  - Participant lists current symptoms such as fatigue, post-exercise fatigue, brain fog, and ringing in the ears. The symptoms are rated 6–9/10 bothersome as of 09/2022. Participant rests in bed 16hr/day and has discontinued usual exercise routine. Provider believes symptoms due to long COVID-19.
  - Clinical trial approves temporary discontinue of therapeutic trial and reassessment before continuing the trial.
  - Temporary dose delay for 2 weeks offered, but participant unresponsive to follow-up emails. Voicemail left with contact info. See communications log.
  - Follow-up response on 11/2022: participant who requested to withdraw has been asked to schedule a debriefing appointment.
- 5 mg
  - Participant reports “GI” on survey. Follow-up confirms participant is experiencing constipation. Hx of recurrent constipation, but participant notes this case is more severe than before the trial (no bothersome scale given).
  - Participant reports seeking care from PHP and Gastroenterologist, both of whom recommended OTC Miralax. Participant Tx’d with Miralax for 2–3 weeks and symptoms did not resolve. Participant notes not having a bowel movement for up to 1 week during this time.
  - Participant reports being advised to discontinue the therapeutic trial. Follow-ups sent to confirm who recommended this and the dates at which this occurred, as it is not documented.



- Follow-up confirms their provider believes the issue is therapeutic trial and advised them to discontinue. After 2 weeks of unreported delayed doses, symptoms improved. The participant decided to withdraw from the trial, based on their provider's advice.
- Placebo
  - Participant reports via email, lumps in their groin. Participant has a personal and family Hx of lipoma. CT performed, inflamed lymph nodes suspected but not diagnosed.
  - Follow-up denies Hx of inflamed lymph nodes. Lumps are bothersome (did not provide a rating) and hard with no discoloration. There are 3× in total as of 08/24 but began with only 1× ~2–3mo ago. The last one appeared in the past 2 weeks. Participant notes previously unreported hip pain that they attribute as the lumps compressing the groin area.
  - Biopsy on 08/24, results expected 08/29. Provider does not believe it is related to Rapamycin. Participant expressed desire to continue in the trial as long as it is approved by trial clinician to do so.
  - In 09/2022 follow up, reports Dx of “metastatic, small-cell neuroendocrine adenocarcinoma”. Participant advised to discontinue immediately due to upcoming chemotherapy treatments.
  - 05/2023 email follow-up with clinical staff, participant reports no cancer from scans and results. Still withdrew from study at this time.

**SAE:**

- 5 mg, completed trial.
  - Participant reports 2 days “inpatient” (unable to confirm inpatient status versus admitted for observation) for “anemia” and given “one unit” of blood via transfusion. Respiratory symptoms (i.e. shortness of breath) appear to be due to anemia and not pneumonia.
  - Anemia was resolved via blood transfusion and participant was sent home from hospital. No further AE reported.
- 5 mg, completed trial.
  - Participant reported “Congestion, Cough, Mild pains, Joints, Back/Ribs/Arms/Legs, Mouth irritation” via survey. Follow-ups indicated that illness progressed, and participant directed to consult Primary Healthcare Provider (PHP), who prescribed: 4× days of Prednisone, 10× days of Doxycycline hyclate, and Albuterol inhaler BID. Illness was originally documented as an expected adverse event and then upgraded to severe on 03/2022 due to the participant seeking treatment from the provider, and the worsening of symptoms over time rather than improvement. Participant reports this illness was unusually severe compared to previous colds/illnesses. Participant was asked to skip doses while administering prescription medication from Primary Healthcare Provider. Participant skipped one dose, which was logged in the Protocol Deviation Log.
  - Participant took medications as prescribed and reported complete resolution.
- SAE, Placebo, deceased and did not complete study.
  - Participant reported expected adverse event consisting of “GI” via survey (which are exported and reviewed for the whole trial 3–4×/mo). Participant followed up with staff via email detailing flu-like symptoms and rib pain (also expected), which appeared to be resolving at the time of follow-up. Participant did not respond to further emails requesting more information regarding details of symptoms, any treatments taken, and complete resolution. Participant stopped filling out weekly adverse event surveys. It is not uncommon for PEARL participants to feel overwhelmed by emails or be generally technologically avoidant due age, so some leniency is provided in our standard procedures before withdrawing the participant.
  - The PHP later contacted trial staff to confirm hospital records document cardiogenic shock due to myocardial infarction as the cause of death. While Rapamycin/Sirolimus may cause changes in heart rate, other cardiac events are not reported as a possible side effect. Participant was out of town during this time and did not receive care from local hospital or clinic, which may have caused delay in reporting to trial staff.
- SAE, Placebo, completed trial.
  - Participant reports going to the ER for “a stomach virus”, which presented with nausea, vomiting, and diarrhea. The ER diagnosed the participant with a “small urinary infection” and prescribed Nitrofurantoin mono/mac 100 mg caps for 5 days and Ondansetron ODT 4mg tablets. The participant did not require in-patient hospitalization, but felt uncomfortable enough to go to the ER. Symptoms resolved with treatment.

- SAE, 10 mg, completed trial.
  - Participant’s spouse reports going to the ER for “a 10/10 sore throat” 07/2023 during follow-up concerning resolution of symptoms previously reported in routine health survey: Cough, tightness of breath, and “Amoxicillin for Strep as of 7–23”. Tightness of breath denied in follow-up with spouse. Spouse also denies fever. Participant treated with OTC cough medicine and Vitamin C prior to going to the emergency room.
  - Participant did not require in-patient hospitalization, but felt uncomfortable enough to go to the ER.
  - ER tested for COVID-19 (negative) and 2× Streptococcus (one “quick test” that was not positive and one culture). There has been no follow-up on the culture as of 07/2023. ER “did not see white spots on [their] tonsils” and there was no fever. ER did not diagnose Strep throat and did not prescribe medications. Participant called PHP and PHP prescribed both Amoxicillin and “pain medication”. Pain medication was out of stock, but participant’s spouse reports symptom improvement 12hrs after Amoxicillin administration.
  
- AE, Placebo, completed trial.
  - \*Note: Participant was not hospitalized and did not require an invasive procedure nor was disabled. Designated not SAE upon 07/14/2024 audit.
  - Via email, participant reported worsening of injury that occurred prior to enrollment. Participant did not report injury before this time, as it was mild pain in right gluteus and assumed to be related to long-distance running. Participant reports an appointment with a provider specializing in Sport Medicine, who diagnosed “Type III-A tear of my semimembranosus hamstring at the ischial tuberosity” via MRI.
  - Participant is receiving treatment via platelet-rich plasma injection and physical therapy. If not fully healed, the care plan includes a second platelet-rich plasma injection and continued physical therapy. Surgery is an option; however, the participant reported they will not consider it until the other treatments have failed, which will be “for at least 9 months”.
  - Participant advised to be sure to notify care team of possible Rapmycin administration, which may slow healing. If the care team decides for the participant to discontinue administration, withdrawal and/or delay of dosing options will be discussed at that time.

## Supplementary Figures

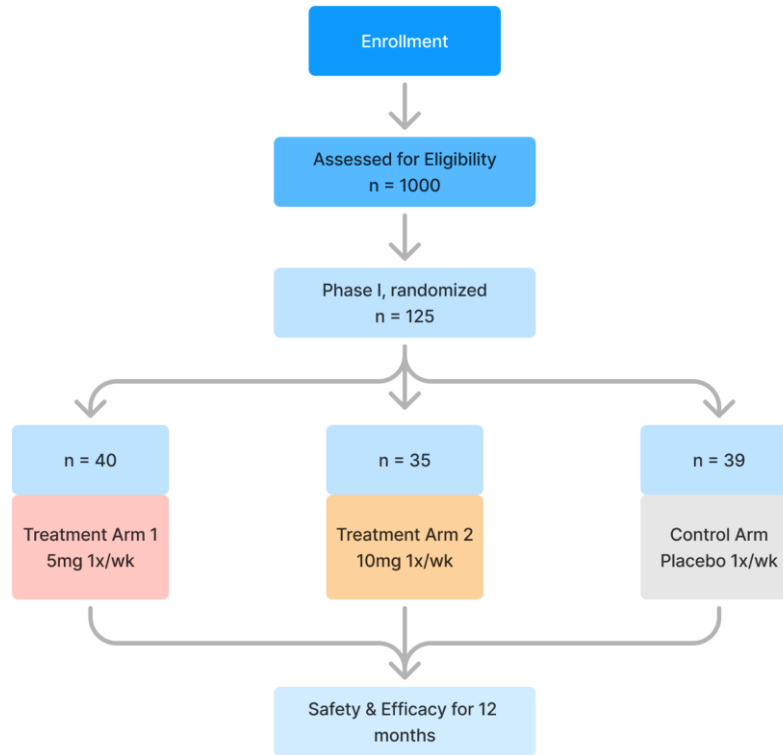

**Supplementary Figure 1. PEARL trial design.** Schematic of trial enrollment, participant screening, randomization, and follow-up.

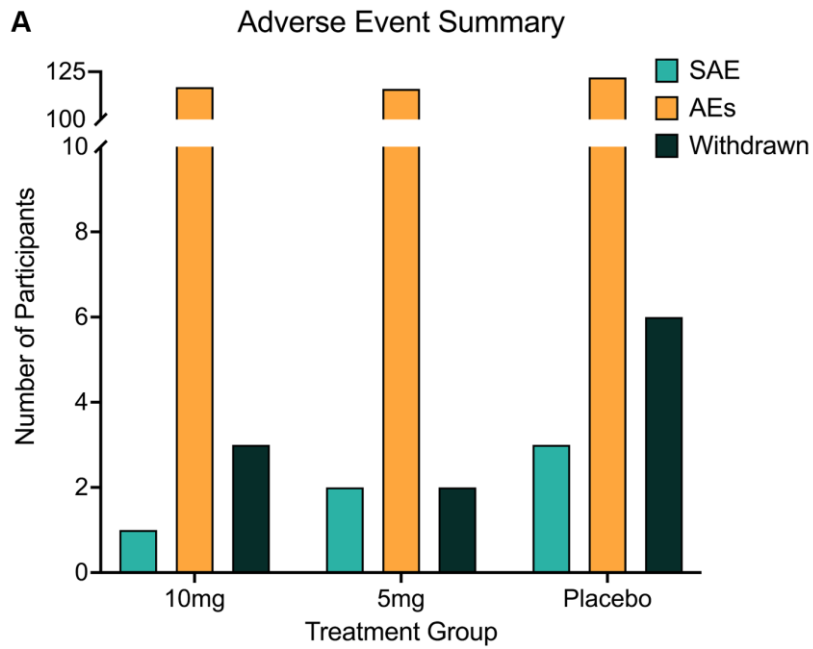

**B Total AEs by Gender**

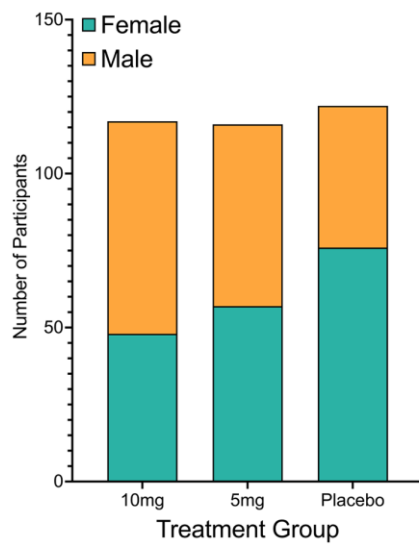

**C Individuals with AEs by Gender**

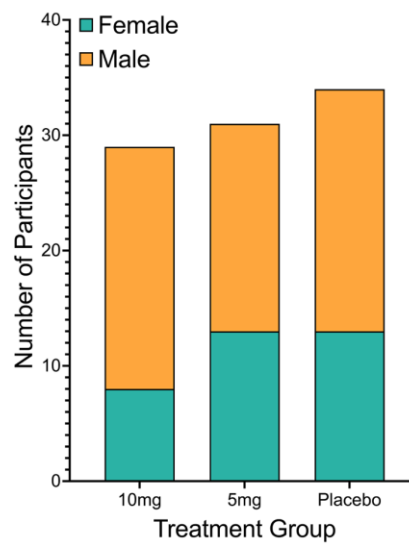

**Supplementary Figure 2. Summary of adverse events and types for PEARL participants.** Participants across all groups reported a similar number of incidences of adverse events, with the highest rates of serious adverse events in placebo users (A). Adverse event numbers were similar by gender for all groups (B), and in total number of participants experiencing adverse events in each group (C).

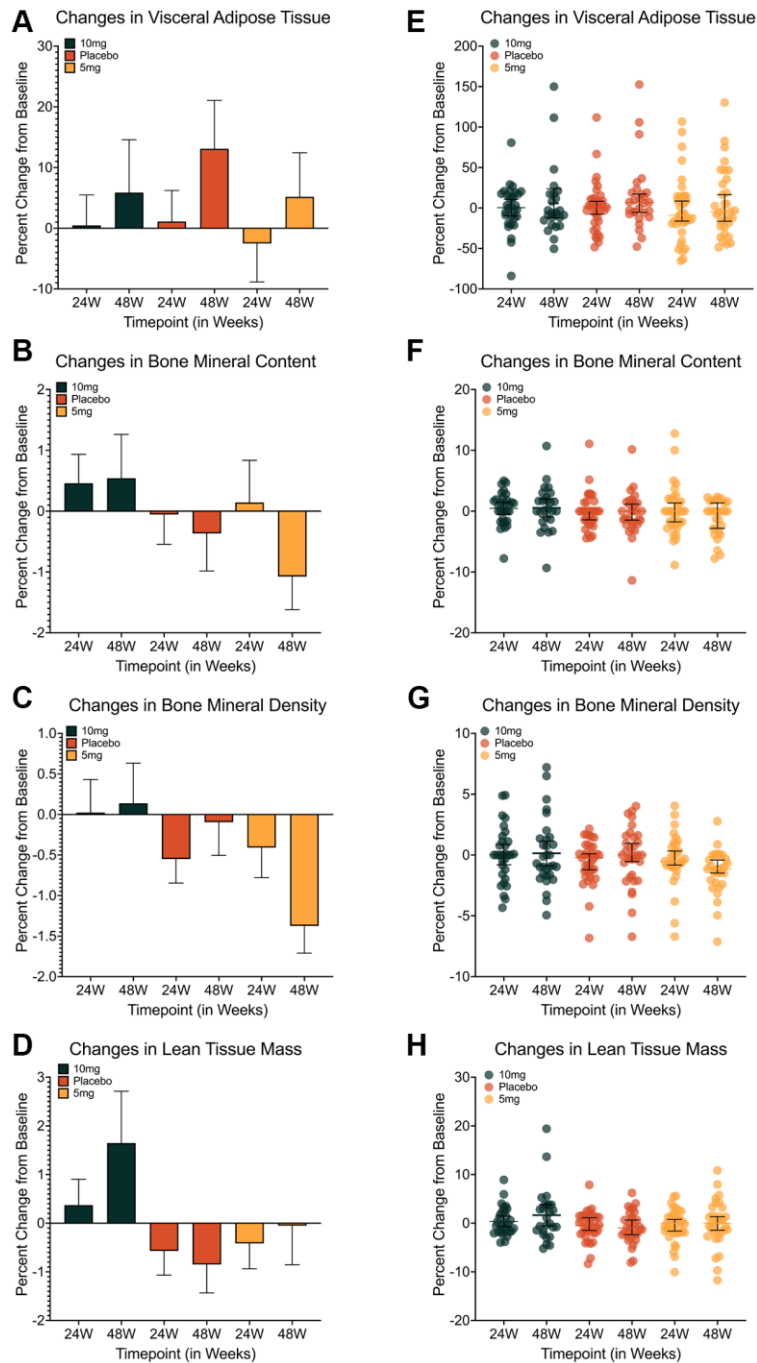

**Supplementary Figure 3. Changes in body composition during the PEARL trial.** Body composition measures did not change significantly over the course of the trial for groups as a whole, despite trending differences of improvement for means in some measures (A–D). However, individual changes during the study period were widely varied across all doses and groups (E–H). Error bars represent standard error of the mean.

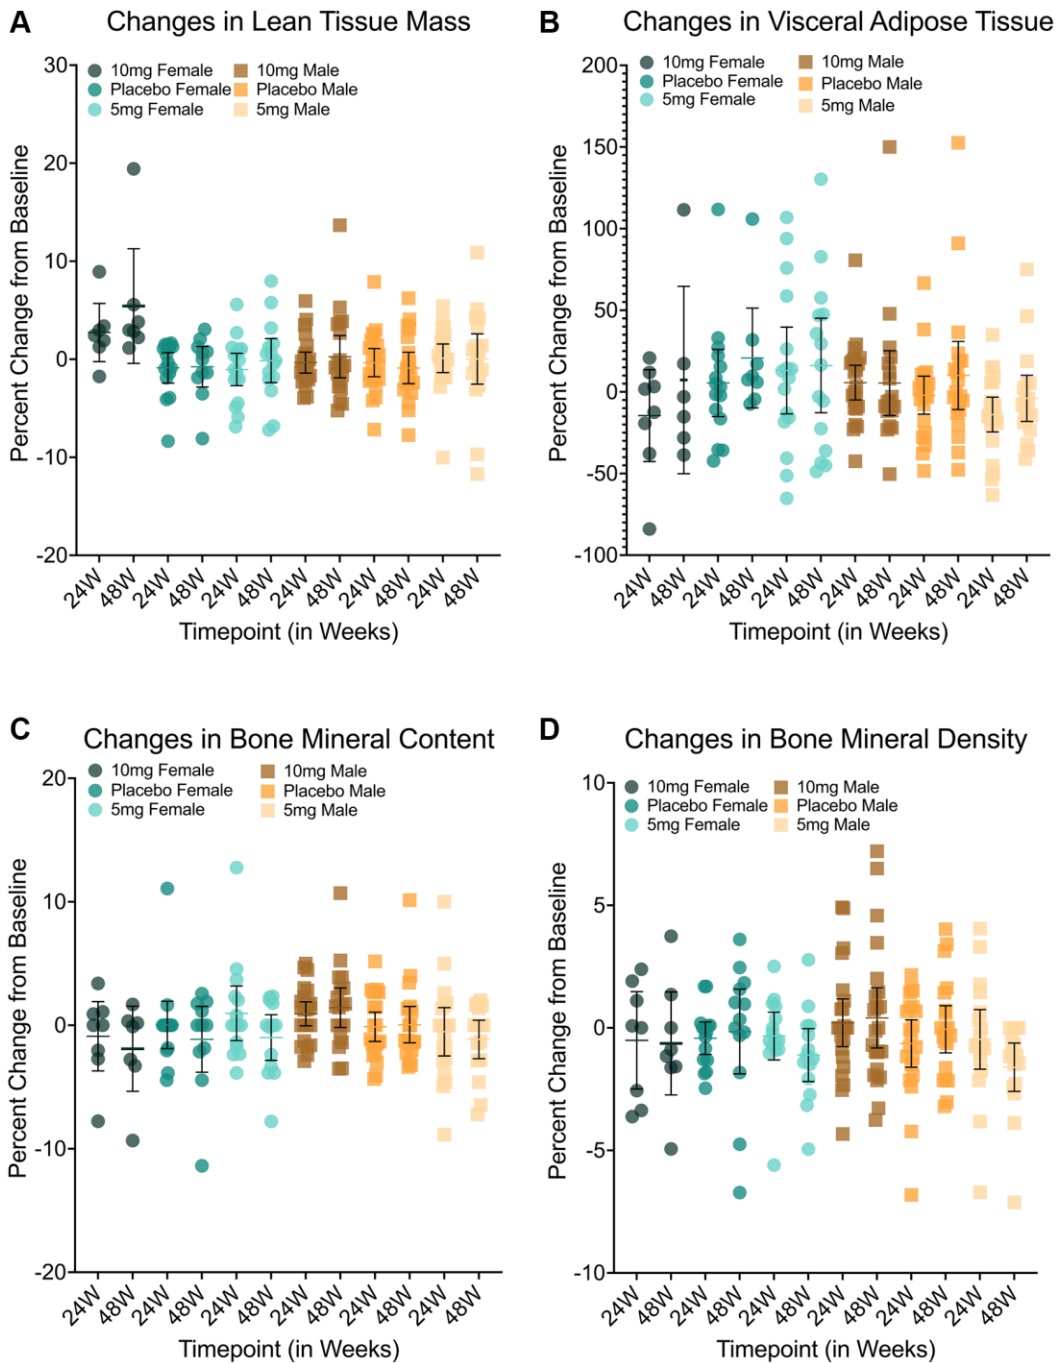

**Supplementary Figure 4. Heterogeneity of individual response in body composition for each gender during the PEARL trial.** Individual responses for measures of body composition change span a range of values for each dose and gender (A–D). Bars represent the 95% CI, dots represent individuals.



## Supplementary Tables

Please browse Full Text version to see the data of Supplementary Tables 2–7 and 9.

**Supplementary Table 1. Demographic information for all study participants.**

| Treatment group | Gender | N  | Percent N in group | Percent N overall | Category    | Minimum | Maximum | Mean  | Std. deviation |
|-----------------|--------|----|--------------------|-------------------|-------------|---------|---------|-------|----------------|
| 10 mg           | F      | 8  | 22.86%             | 20.00%            | Age (years) | 51      | 76      | 58.75 | 8.17           |
|                 |        |    |                    |                   | BMI         | 19.5    | 29.3    | 23.88 | 3.97           |
|                 |        |    |                    |                   | Weight (kg) | 49.9    | 85.59   | 65.81 | 10.42          |
|                 |        |    |                    |                   | Height (in) | 60      | 71      | 65.5  | 3.89           |
|                 | M      | 27 | 77.14%             | 36.49%            | Age         | 51      | 81      | 63.78 | 9.27           |
|                 |        |    |                    |                   | BMI         | 22.1    | 34.6    | 26.13 | 2.93           |
|                 |        |    |                    |                   | Weight      | 66.22   | 115.67  | 84.06 | 11.62          |
|                 |        |    |                    |                   | Height      | 67      | 77      | 70.62 | 2.39           |
|                 | Total  | 35 | 100.00%            | 30.70%            | Age         | 51      | 81      | 62.63 | 9.17           |
|                 |        |    |                    |                   | BMI         | 19.5    | 34.6    | 25.58 | 3.29           |
|                 |        |    |                    |                   | Weight      | 49.9    | 115.67  | 79.77 | 13.68          |
|                 |        |    |                    |                   | Height      | 60      | 77      | 69.38 | 3.55           |
| Placebo         | F      | 15 | 38.46%             | 37.50%            | Age         | 55      | 71      | 62.33 | 4.89           |
|                 |        |    |                    |                   | BMI         | 18.9    | 27.1    | 22.39 | 2.63           |
|                 |        |    |                    |                   | Weight      | 49.9    | 73.94   | 62.32 | 7.78           |
|                 |        |    |                    |                   | Height      | 62      | 69      | 65.31 | 2.15           |
|                 | M      | 24 | 61.54%             | 32.43%            | Age         | 52      | 78      | 62.83 | 7.57           |
|                 |        |    |                    |                   | BMI         | 19.4    | 31.4    | 25.38 | 2.73           |
|                 |        |    |                    |                   | Weight      | 61.23   | 105.64  | 82.67 | 12.01          |
|                 |        |    |                    |                   | Height      | 67      | 77      | 70.93 | 2.49           |
|                 | Total  | 39 | 100.00%            | 34.21%            | Age         | 52      | 78      | 62.64 | 6.6            |
|                 |        |    |                    |                   | BMI         | 18.9    | 31.4    | 24.3  | 3.03           |
|                 |        |    |                    |                   | Weight      | 49.9    | 105.64  | 75.17 | 14.49          |
|                 |        |    |                    |                   | Height      | 62      | 77      | 68.9  | 3.6            |
| 5 mg            | F      | 17 | 42.50%             | 42.50%            | Age         | 50      | 77      | 61.12 | 7.92           |
|                 |        |    |                    |                   | BMI         | 18.5    | 30.7    | 23.53 | 3.4            |
|                 |        |    |                    |                   | Weight      | 44.45   | 91.49   | 62.65 | 11.78          |
|                 |        |    |                    |                   | Height      | 61      | 68      | 63.93 | 1.87           |
|                 | M      | 23 | 57.50%             | 31.08%            | Age         | 50      | 74      | 61.17 | 7.52           |
|                 |        |    |                    |                   | BMI         | 21.5    | 36.5    | 26.33 | 3.11           |
|                 |        |    |                    |                   | Weight      | 68.04   | 118.66  | 84.17 | 10.55          |
|                 |        |    |                    |                   | Height      | 65      | 75      | 70.49 | 2.39           |
|                 | Total  | 40 | 100.00%            | 35.09%            | Age         | 50      | 77      | 61.15 | 7.59           |
|                 |        |    |                    |                   | BMI         | 18.5    | 36.5    | 25.18 | 3.47           |
|                 |        |    |                    |                   | Weight      | 44.45   | 118.66  | 75.56 | 15.26          |
|                 |        |    |                    |                   | Height      | 61      | 75      | 67.68 | 3.93           |

**Supplementary Table 2. Baseline Measurements for body composition, self-report surveys, and bloodwork.**

**Supplementary Table 3. Detail of adverse and serious adverse events for all trial participants.**

Supplementary Table 4. Analysis of body composition changes over time.

Supplementary Table 5. Analysis of blood marker changes over time.

Supplementary Table 6. Analysis of blood marker which change significantly over time.

Supplementary Table 7. Analysis of gut microbiome measures.

Supplementary Table 8. Analysis of WOMAC self-reported measures of well-being.

| Means and standard deviations |                                           |             |                |    |         |                |    |        |                |    |
|-------------------------------|-------------------------------------------|-------------|----------------|----|---------|----------------|----|--------|----------------|----|
|                               | Randomization group, source: demographics | All genders |                |    | Females |                |    | Males  |                |    |
|                               |                                           | Mean        | Std. deviation | N  | Mean    | Std. deviation | N  | Mean   | Std. deviation | N  |
| Total 0 weeks                 | 10 mg                                     | 27.387      | 5.0045         | 31 | 29      | 6.6548         | 8  | 26.826 | 4.3343         | 23 |
|                               | Placebo                                   | 29.7        | 8.8362         | 30 | 30.308  | 11.9957        | 13 | 29.235 | 5.7503         | 17 |
|                               | 5 mg                                      | 28.971      | 6.2352         | 34 | 29.133  | 5.6172         | 15 | 28.842 | 6.8334         | 19 |
| Total 24 weeks                | 10 mg                                     | 26.871      | 6.4122         | 31 | 26.75   | 4.0267         | 8  | 26.913 | 7.1345         | 23 |
|                               | Placebo                                   | 29.567      | 9.3244         | 30 | 31.846  | 12.3817        | 13 | 27.824 | 5.9291         | 17 |
|                               | 5 mg                                      | 29.529      | 12.3147        | 34 | 31.2    | 16.7298        | 15 | 28.211 | 7.495          | 19 |
| Total 48 weeks                | 10 mg                                     | 28.161      | 6.3198         | 31 | 26      | 1.4142         | 8  | 28.913 | 7.179          | 23 |
|                               | Placebo                                   | 28.567      | 7.3938         | 30 | 29.538  | 9.3239         | 13 | 27.824 | 5.7035         | 17 |
|                               | 5 mg                                      | 27.353      | 4.7026         | 34 | 26.8    | 2.8082         | 15 | 27.789 | 5.8269         | 19 |
| Pain 0 weeks                  | 10 mg                                     | 6.032       | 1.8526         | 31 | 6.625   | 2.9246         | 8  | 5.826  | 1.3366         | 23 |
|                               | Placebo                                   | 6.1         | 1.7489         | 30 | 6.462   | 2.4364         | 13 | 5.824  | 0.951          | 17 |
|                               | 5 mg                                      | 6.529       | 2.0778         | 34 | 6.533   | 1.9223         | 15 | 6.526  | 2.2452         | 19 |
| Pain 24 weeks                 | 10 mg                                     | 5.839       | 1.8991         | 31 | 6.125   | 1.8851         | 8  | 5.739  | 1.9357         | 23 |
|                               | Placebo                                   | 6.3         | 2.152          | 30 | 7       | 2.7988         | 13 | 5.765  | 1.3477         | 17 |
|                               | 5 mg                                      | 6.353       | 2.4727         | 34 | 6.933   | 3.1045         | 15 | 5.895  | 1.7918         | 19 |
| Pain 48 weeks                 | 10 mg                                     | 6.355       | 2.1377         | 31 | 5.875   | 1.126          | 8  | 6.522  | 2.3907         | 23 |
|                               | Placebo                                   | 6.2         | 2.4551         | 30 | 6.923   | 3.4269         | 13 | 5.647  | 1.1695         | 17 |
|                               | 5 mg                                      | 5.912       | 1.4221         | 34 | 5.6     | 0.9103         | 15 | 6.158  | 1.7083         | 19 |
| Stiffness 0 weeks             | 10 mg                                     | 2.774       | 0.956          | 31 | 3.25    | 1.165          | 8  | 2.609  | 0.8388         | 23 |
|                               | Placebo                                   | 3.267       | 1.2847         | 30 | 3.231   | 1.5359         | 13 | 3.294  | 1.1048         | 17 |
|                               | 5 mg                                      | 3.118       | 1.2251         | 34 | 3.533   | 1.302          | 15 | 2.789  | 1.0842         | 19 |
| Stiffness 24 weeks            | 10 mg                                     | 2.645       | 0.8774         | 31 | 2.875   | 0.991          | 8  | 2.565  | 0.8435         | 23 |
|                               | Placebo                                   | 2.9         | 1.0939         | 30 | 2.923   | 1.1875         | 13 | 2.882  | 1.0537         | 17 |
|                               | 5 mg                                      | 2.912       | 1.4846         | 34 | 2.933   | 1.6676         | 15 | 2.895  | 1.3701         | 19 |
| Stiffness 48 weeks            | 10 mg                                     | 2.742       | 0.8152         | 31 | 2.625   | 0.9161         | 8  | 2.783  | 0.7952         | 23 |
|                               | Placebo                                   | 3           | 1.0828         | 30 | 2.846   | 1.2142         | 13 | 3.118  | 0.9926         | 17 |
|                               | 5 mg                                      | 2.706       | 1.0009         | 34 | 2.8     | 0.9411         | 15 | 2.632  | 1.0651         | 19 |
| Physical Function 0 weeks     | 10 mg                                     | 18.581      | 3.5002         | 31 | 19.125  | 4.8532         | 8  | 18.391 | 3.0112         | 23 |
|                               | Placebo                                   | 20.333      | 6.3209         | 30 | 20.615  | 8.3918         | 13 | 20.118 | 4.4142         | 17 |
|                               | 5 mg                                      | 19.324      | 3.7717         | 34 | 19.067  | 3.4115         | 15 | 19.526 | 4.1146         | 19 |
| Physical Function 24 weeks    | 10 mg                                     | 18.387      | 4.0717         | 31 | 17.75   | 1.7525         | 8  | 18.609 | 4.6293         | 23 |
|                               | Placebo                                   | 20.367      | 6.7389         | 30 | 21.923  | 9.0964         | 13 | 19.176 | 4.0963         | 17 |
|                               | 5 mg                                      | 20.265      | 8.8431         | 34 | 21.333  | 12.3269        | 15 | 19.421 | 4.8456         | 19 |
| Physical Function 48 weeks    | 10 mg                                     | 19.065      | 4.082          | 31 | 17.5    | 1.069          | 8  | 19.609 | 4.5998         | 23 |
|                               | Placebo                                   | 19.367      | 4.7233         | 30 | 19.769  | 5.3875         | 13 | 19.059 | 4.2935         | 17 |

5 mg 18.735 2.8102 34 18.4 1.7238 15 19 3.4641 19

| Repeated Measures Mixed ANOVA  |             |         |       |         |                     |         |        |       |         |                     |       |         |       |         |                     |
|--------------------------------|-------------|---------|-------|---------|---------------------|---------|--------|-------|---------|---------------------|-------|---------|-------|---------|---------------------|
| Measure                        | All genders |         |       |         |                     | Females |        |       |         |                     | Males |         |       |         |                     |
|                                | df 1        | df 2    | F     | p-value | Partial eta squared | df 1    | df 2   | F     | P-value | Partial Eta squared | df 1  | df 2    | F     | p-value | Partial Eta squared |
| Total <sup>^</sup>             | 3.548       | 163.227 | 0.84  | 0.49    | 0.018               | 2.649   | 43.709 | 0.324 | 0.783   | 0.019               | 4     | 112     | 1.092 | 0.364   | 0.038               |
| Pain                           | 4           | 184     | 1.215 | 0.306   | 0.026               | 4       | 66     | 0.871 | 0.486   | 0.05                | 4     | 112     | 1.211 | 0.31    | 0.041               |
| Stiffness                      | 4           | 184     | 0.642 | 0.633   | 0.014               | 4       | 66     | 0.15  | 0.962   | 0.009               | 4     | 112     | 1.113 | 0.354   | 0.038               |
| Physical Function <sup>^</sup> | 3.422       | 157.426 | 0.714 | 0.563   | 0.015               | 2.527   | 41.695 | 0.308 | 0.786   | 0.018               | 3.617 | 101.264 | 0.911 | 0.453   | 0.031               |

Abbreviation: df: degrees of freedom. Provided as: between groups, within groups. <sup>^</sup>denotes use of Welch's ANOVA in instances that lack homogeneity of variances. \* $p \leq 0.05$ .

**Supplementary Table 9. Analysis of SF-36 self-reported measures of well-being.**
